# Supplementary material for: Discovery and Fine-Mapping of Glycaemic and Obesity-Related Trait Loci Using High-Density Imputation
Source: PubMed Central journal article supplement (PMC4488845; doi:10.1371/journal.pgen.1005230), 2015-07-01

**A BMI (N = 87,048)**

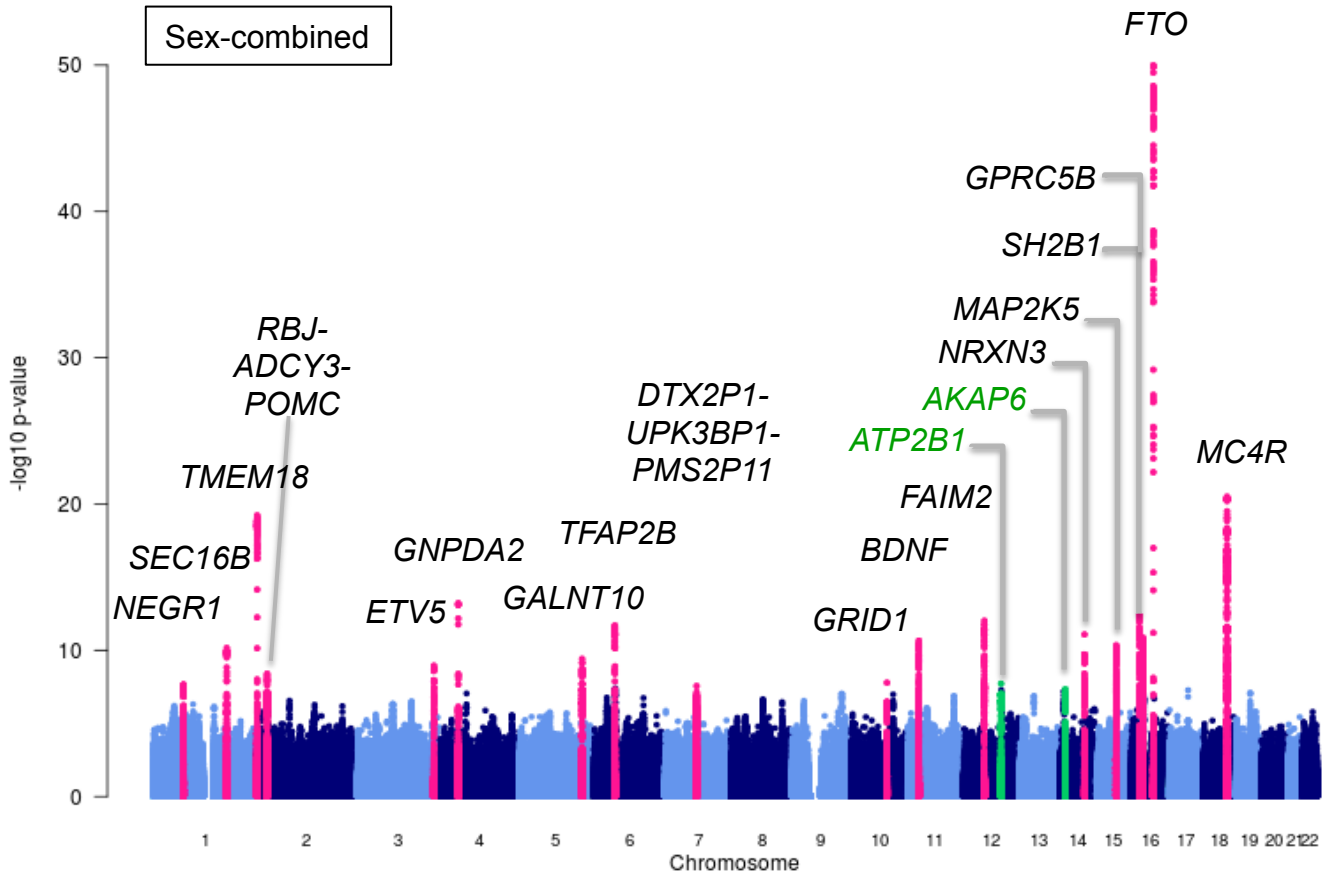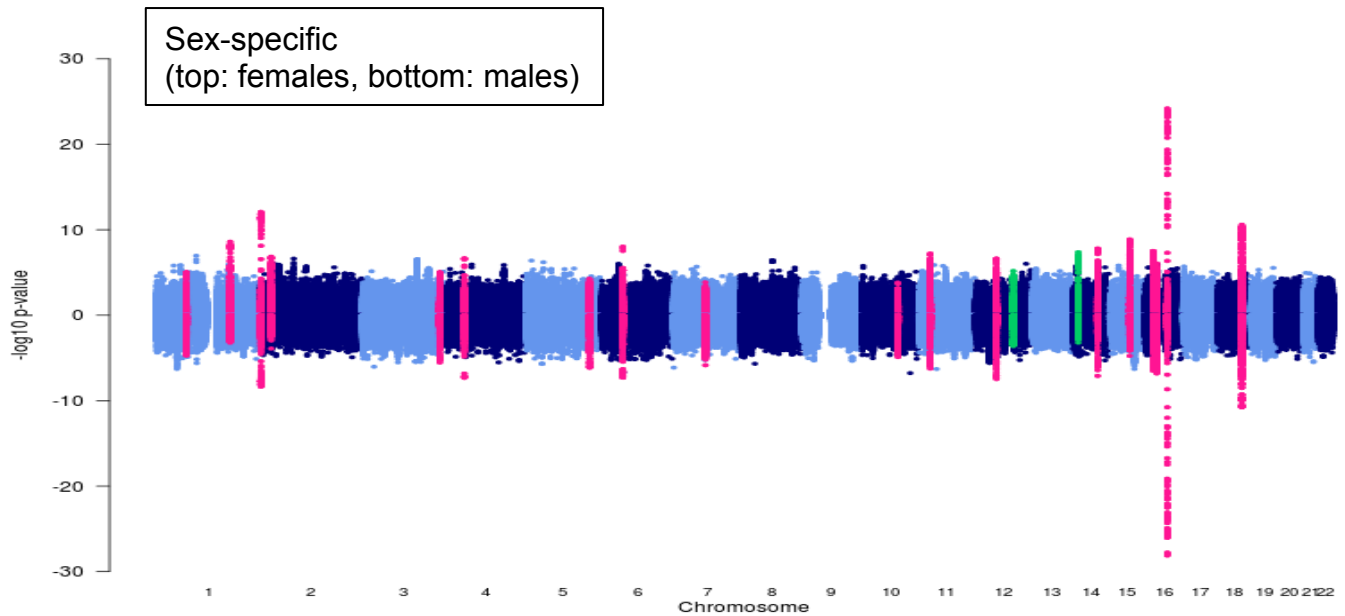

**B**  $WHR_{adjBMI}$  (N = 54,572)

Sex-combined

*RSPO3*

*VEGFA*

*LY86*

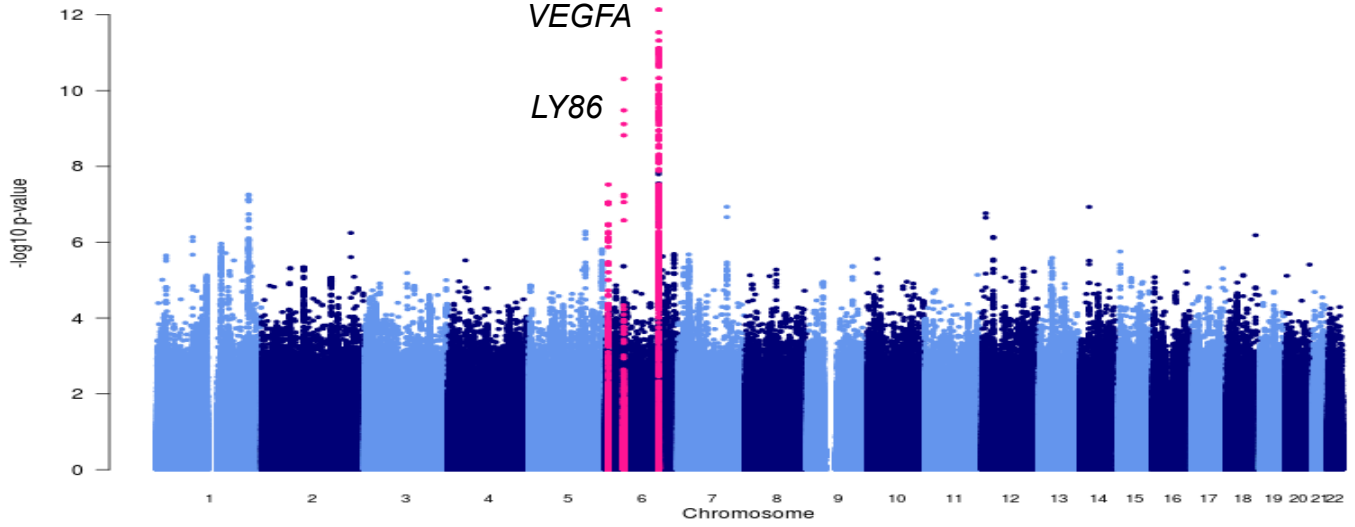

Sex-specific  
(top: females, bottom: males)

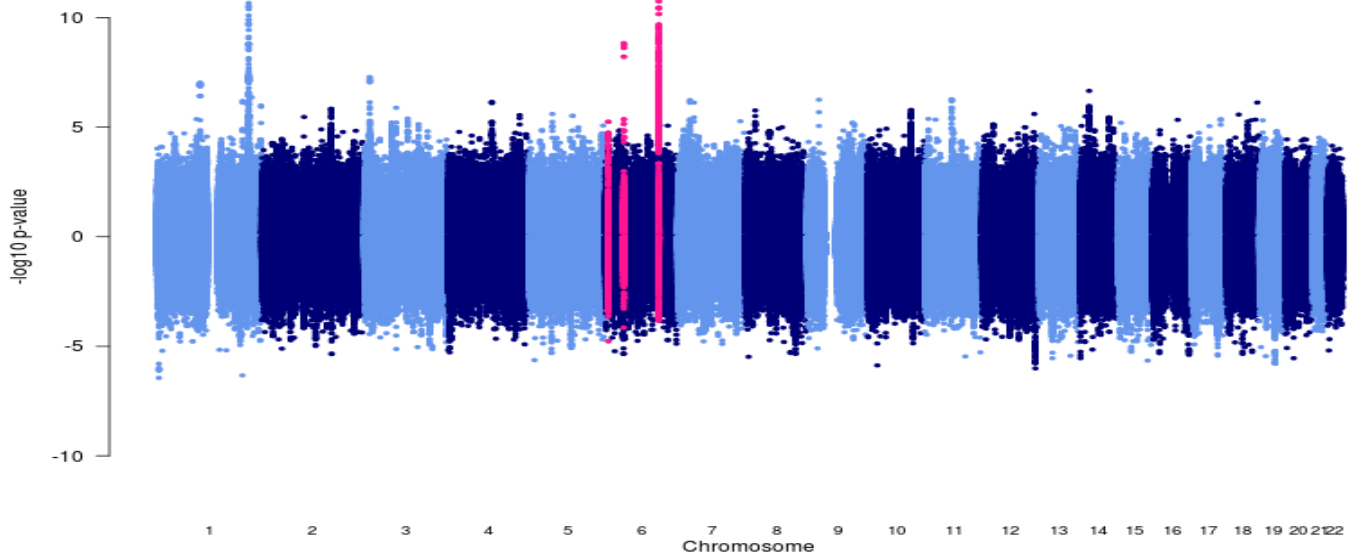

**C** FG (N = 46,694)

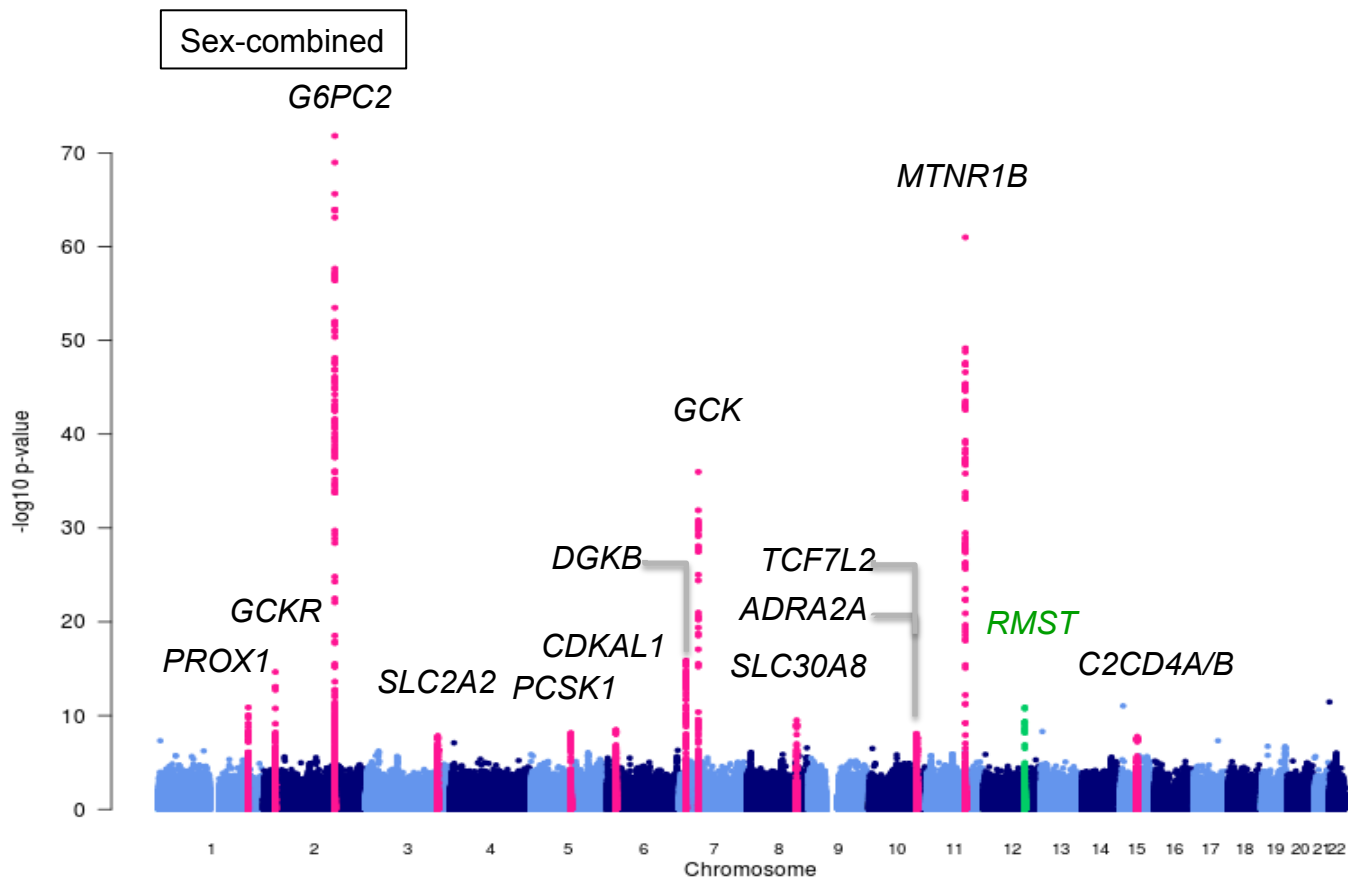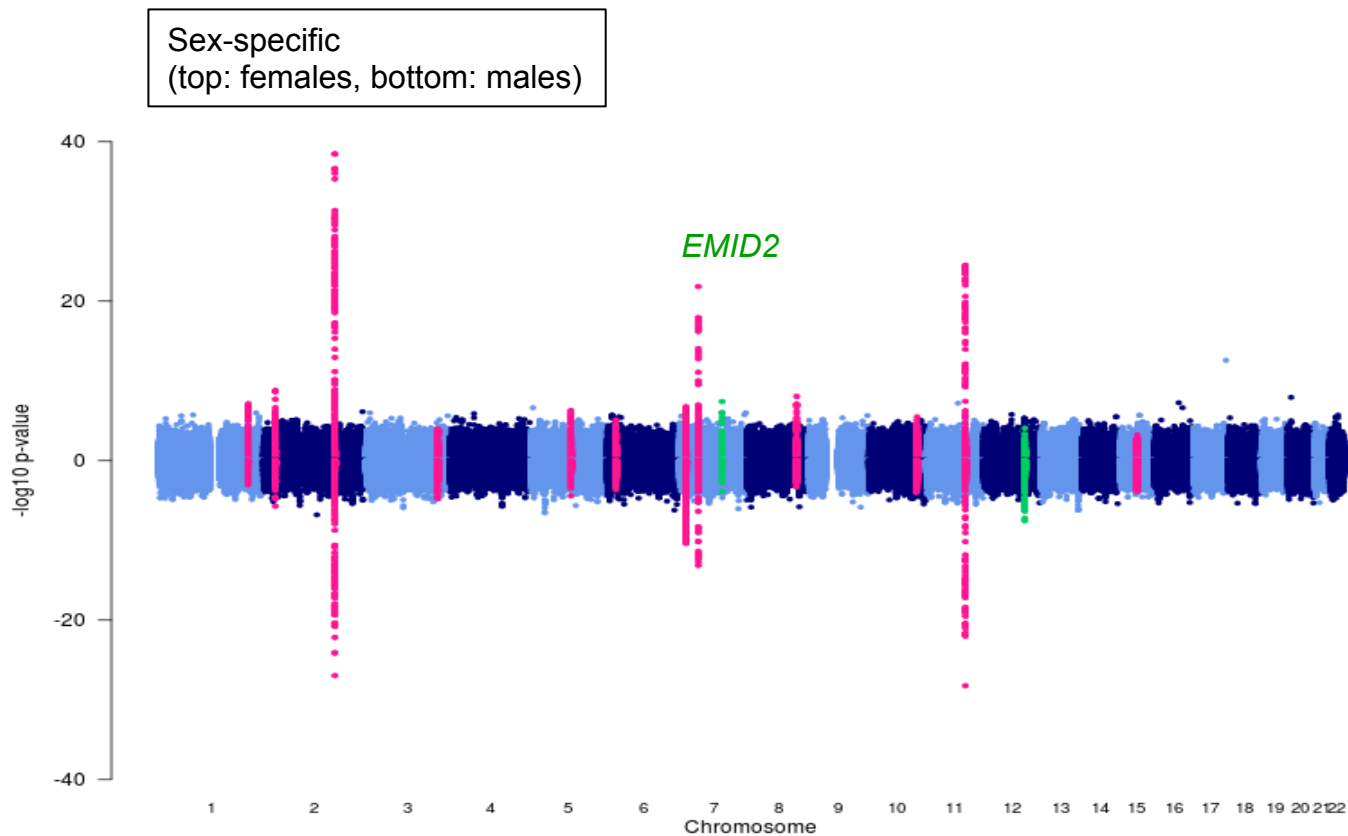

D  $Fl_{adjBMI}$  (N = 24,245)

Sex-combined

*GCKR*

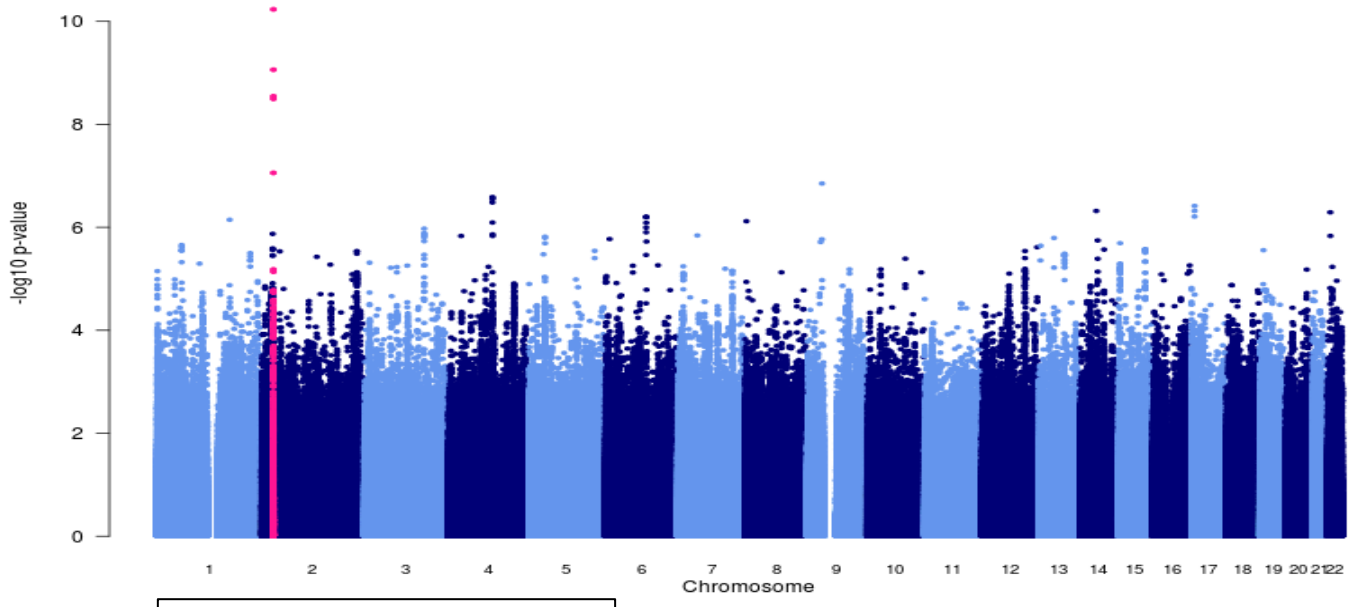

Sex-specific  
(top: females, bottom: males)

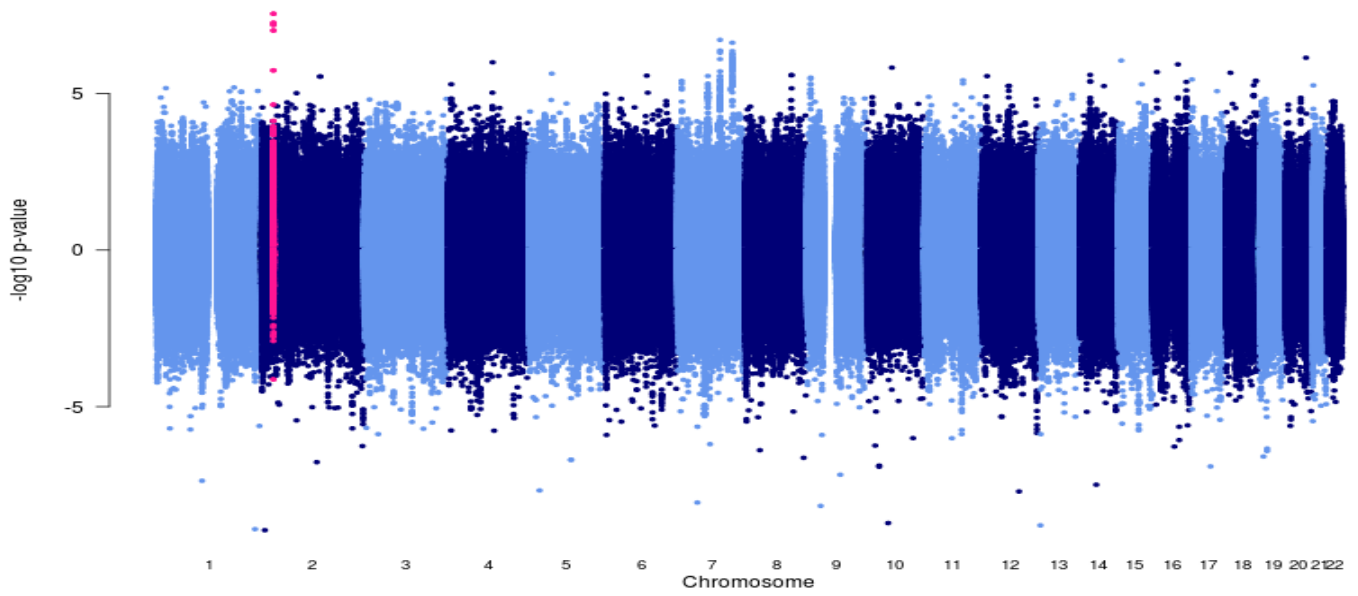

Supplement: pgen.1005230.s002.pdf [file pgen.1005230.s002.pdf]
