# Supplementary material for: Discovery and Fine-Mapping of Glycaemic and Obesity-Related Trait Loci Using High-Density Imputation
Source: PubMed Central journal article supplement (PMC4488845; doi:10.1371/journal.pgen.1005230), 2015-07-01

**A BMI: near *ATP2B1* (rs1966714; N=79,776;  $P = 1.9 \times 10^{-8}$ ; Cochran's Q  $P = 0.91$ )**

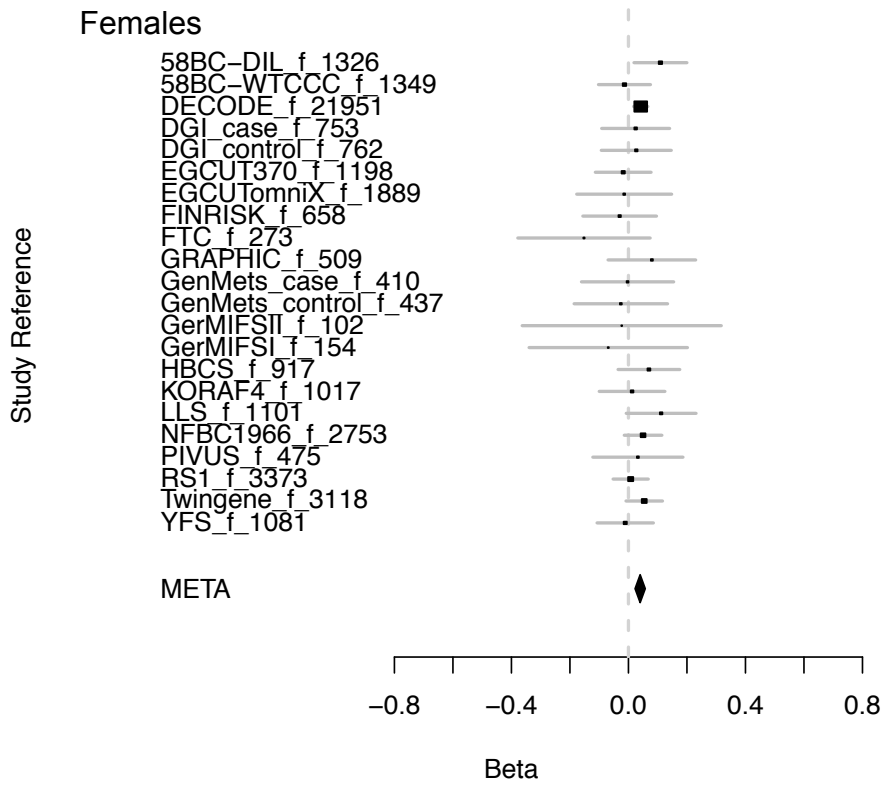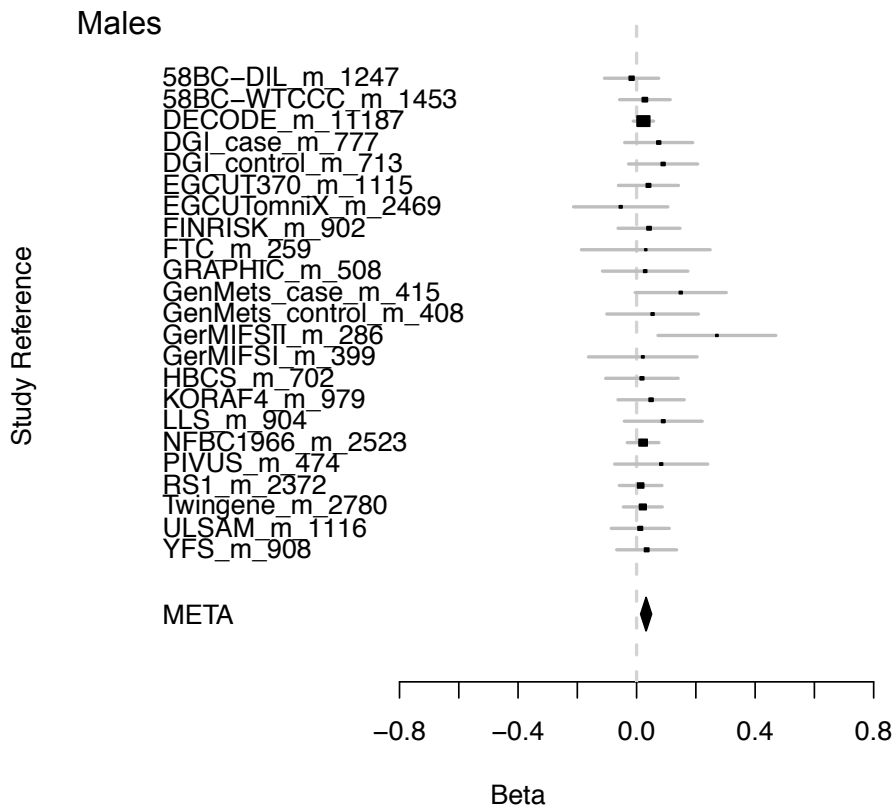

**B BMI: AKAP6 (rs12885467; N=79,536;  $P = 4.5 \times 10^{-8}$ ; Cochran's Q  $P = 0.48$ )**

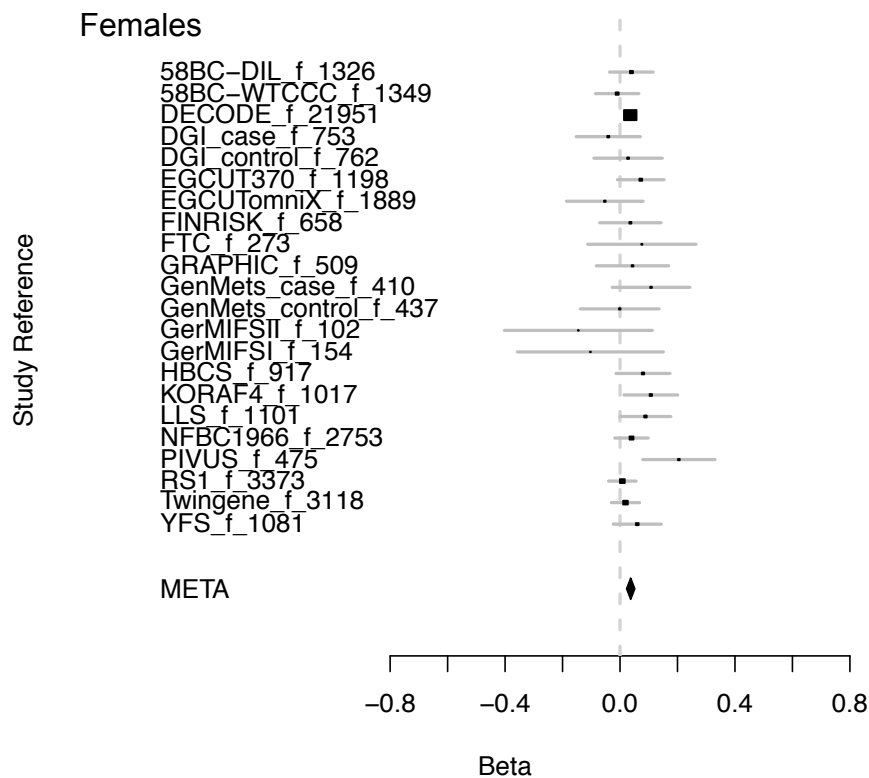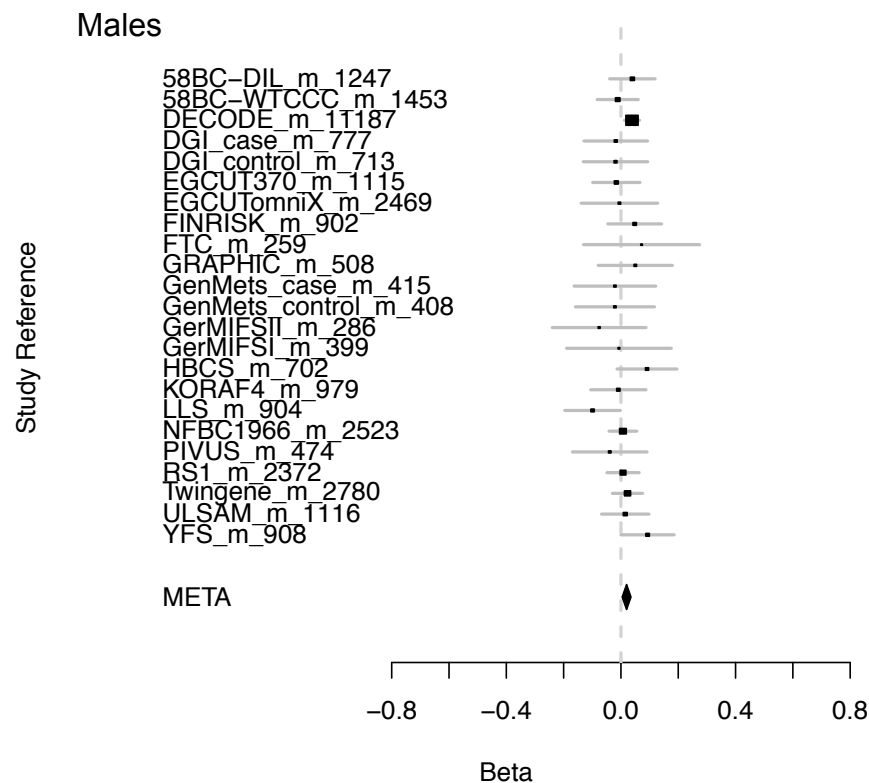

C FG: *RMST* (rs17331697; N=46,650;  $P = 1.3 \times 10^{-11}$ ; Cochran's Q  $P = 0.23$ )

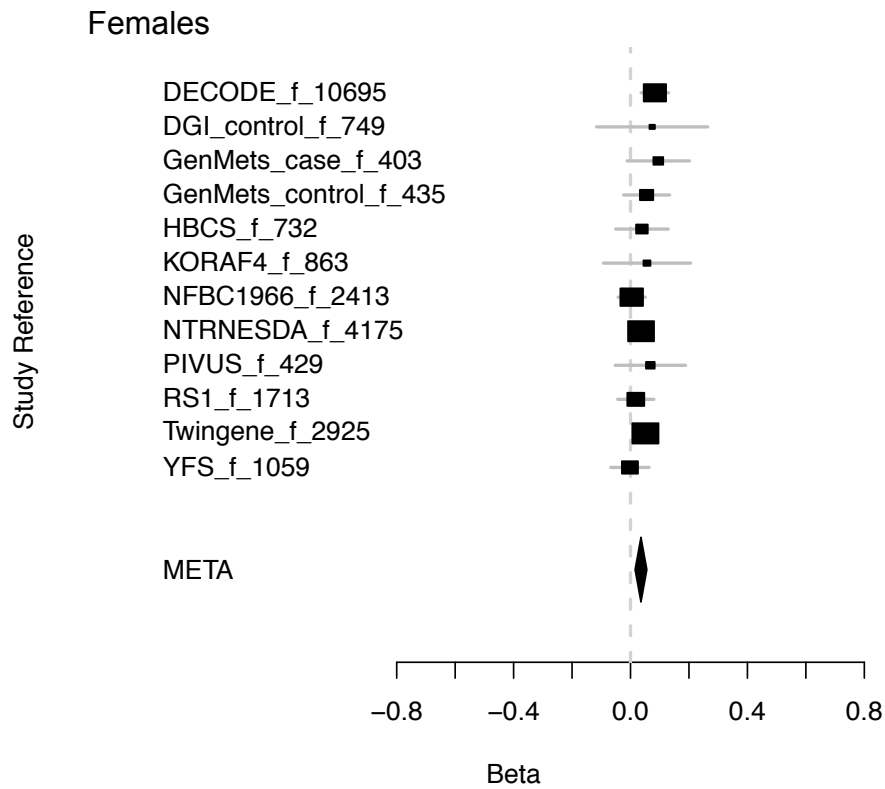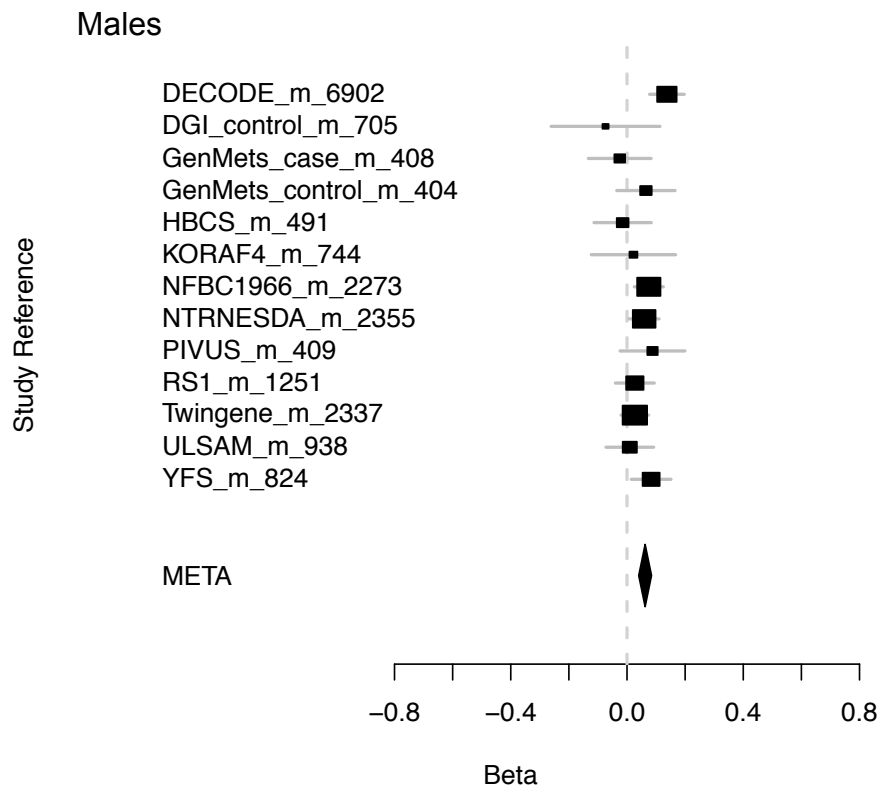

**D FG: *EMID2*** (rs6947345; N=16,336,  $P = 0.50$  in males; N=22,074,  $P = 3.8 \times 10^{-8}$  in females; Cochran's Q  $P = 0.066$ ; sex-heterogeneity  $P = 3.7 \times 10^{-5}$ )

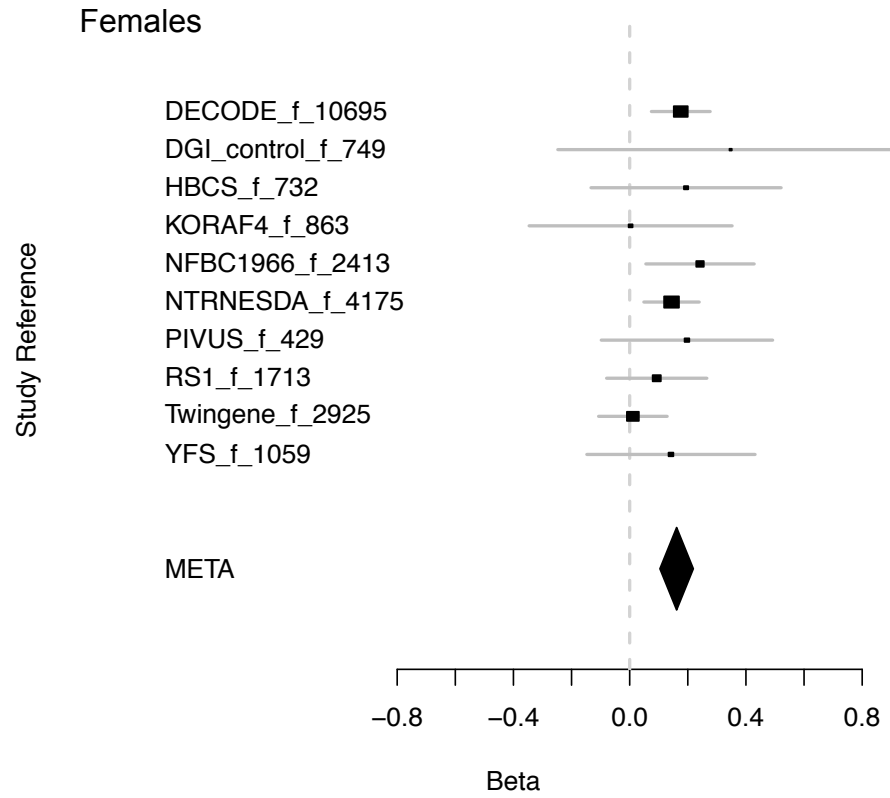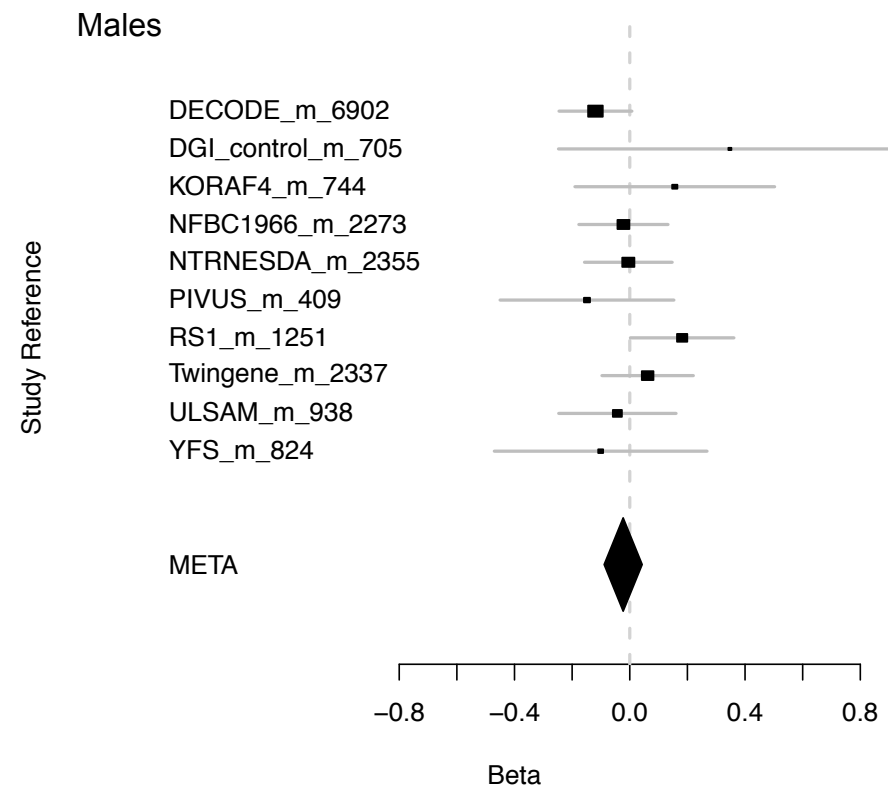

Supplement: pgen.1005230.s004.pdf [file pgen.1005230.s004.pdf]
