# Supplementary material for: Discovery and Fine-Mapping of Glycaemic and Obesity-Related Trait Loci Using High-Density Imputation
Source: PubMed Central journal article supplement (PMC4488845; doi:10.1371/journal.pgen.1005230), 2015-07-01

## A BMI near *ATP2B1*

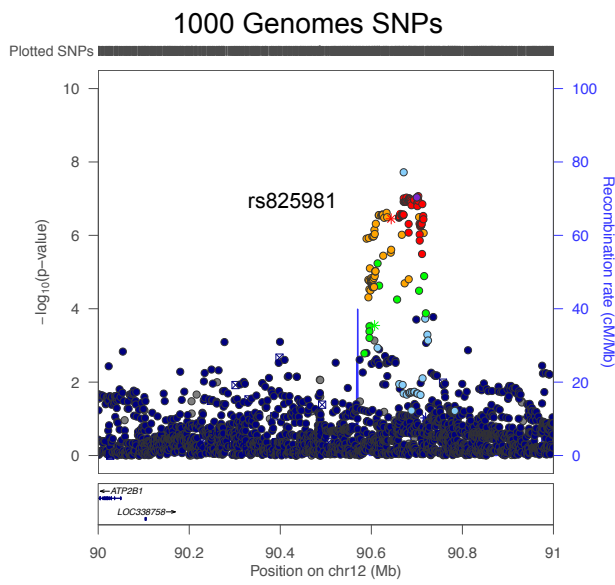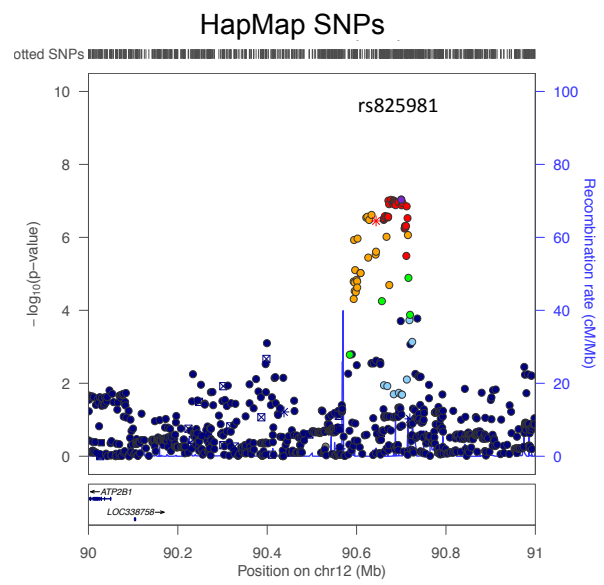

## B BMI *AKAP6*

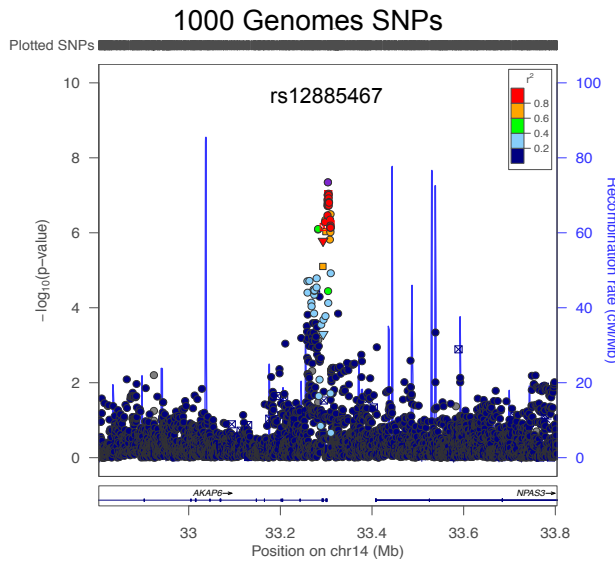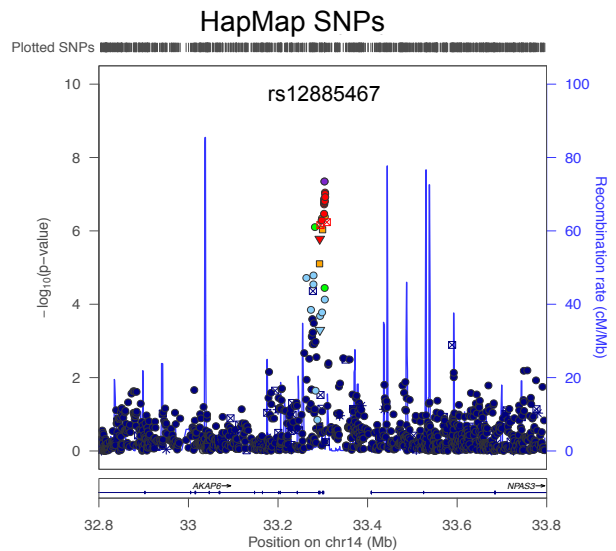

### C FG *RMST*

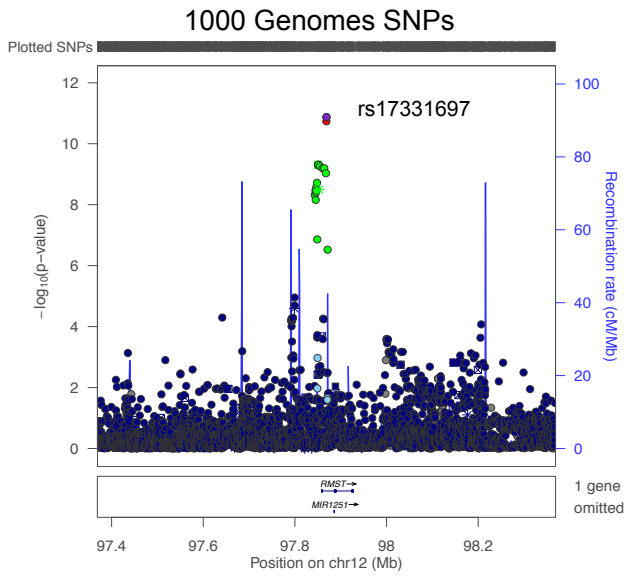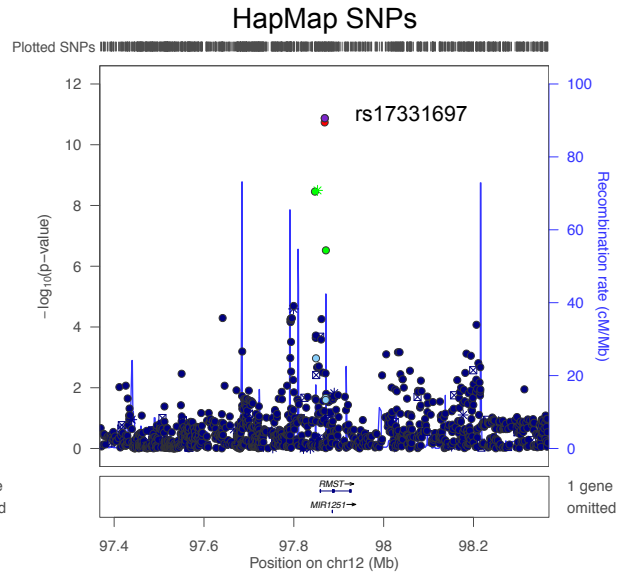

### D FG *EMID2* (females only)

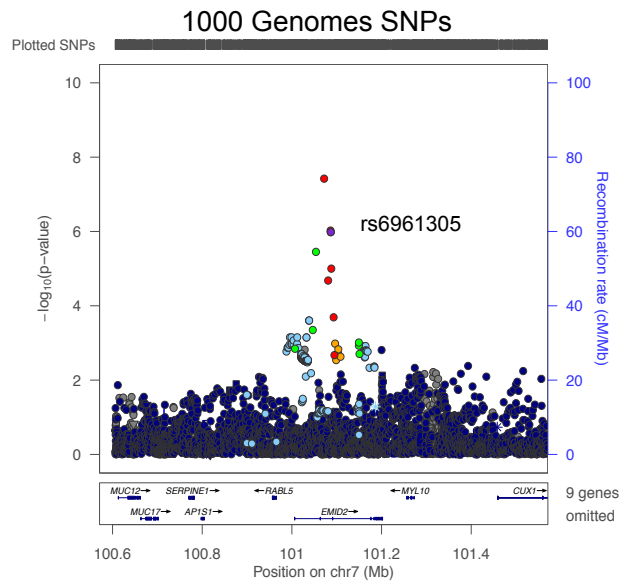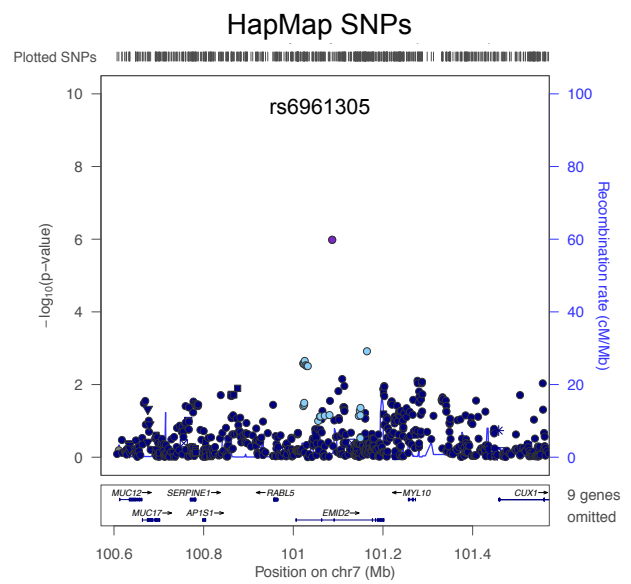

Supplement: pgen.1005230.s005.pdf [file pgen.1005230.s005.pdf]
