# Supplementary material for: Discovery and Fine-Mapping of Glycaemic and Obesity-Related Trait Loci Using High-Density Imputation
Source: PubMed Central journal article supplement (PMC4488845; doi:10.1371/journal.pgen.1005230), 2015-07-01

**A**  $WHR_{adjBMI}$  *RSPO3* primary signal  
1000 Genomes SNPs

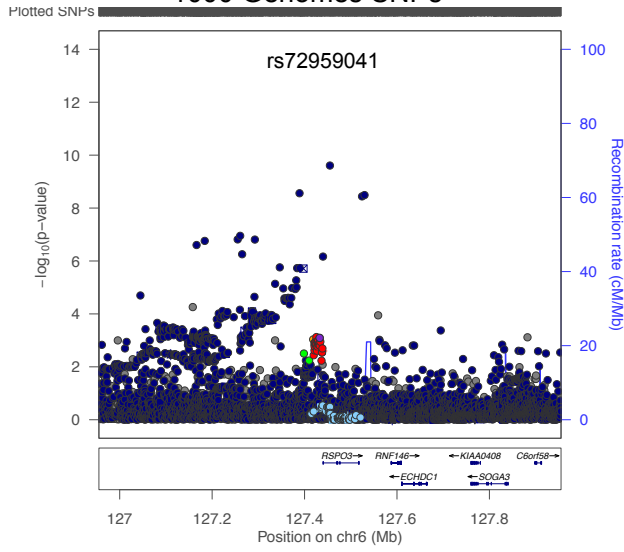

HapMap SNPs

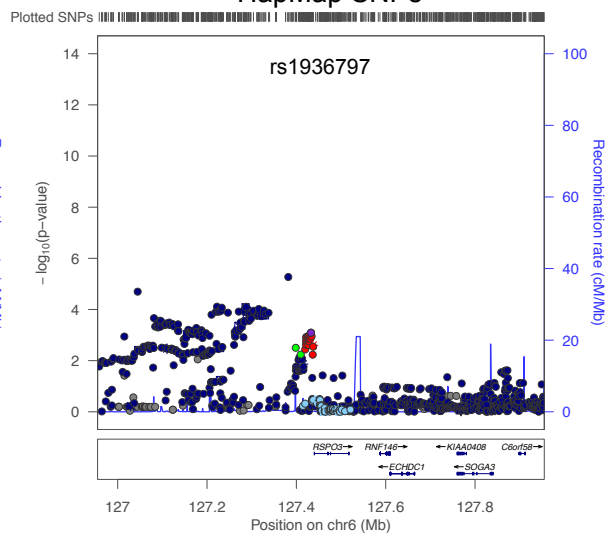

**B**  $WHR_{adjBMI}$  *RSPO3* secondary signal  
1000 Genomes SNPs

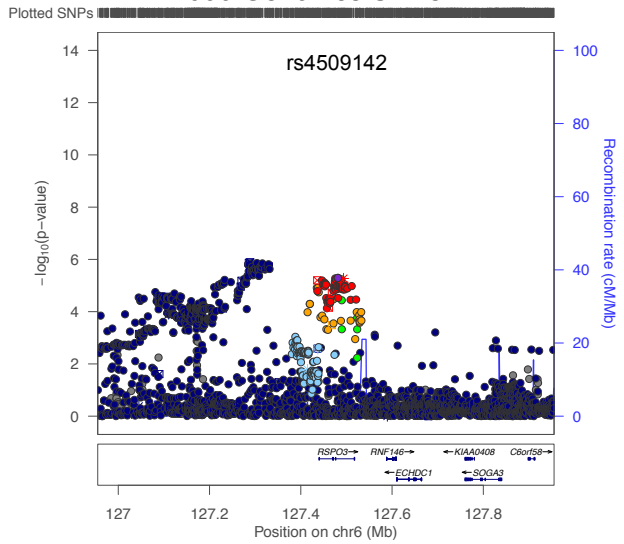

HapMap SNPs

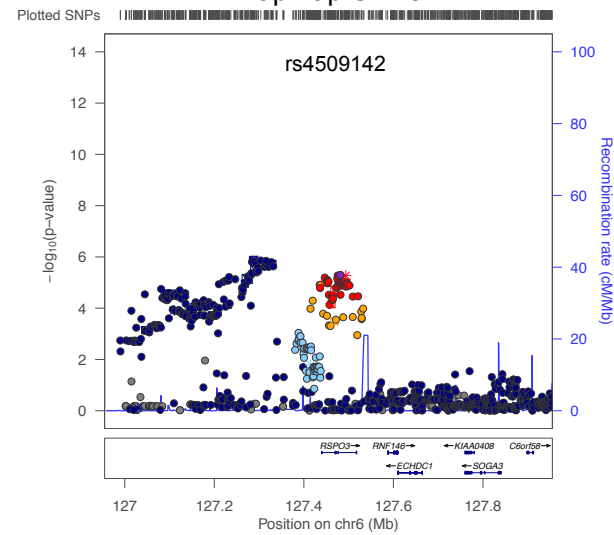

### C FG G6PC2 primary signal

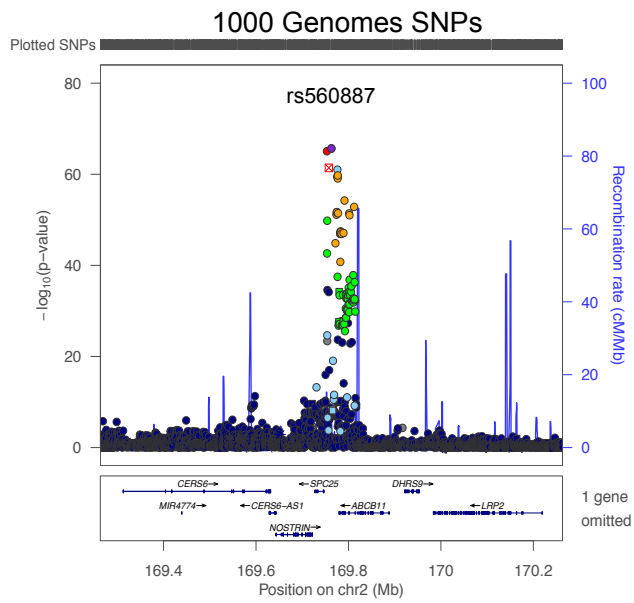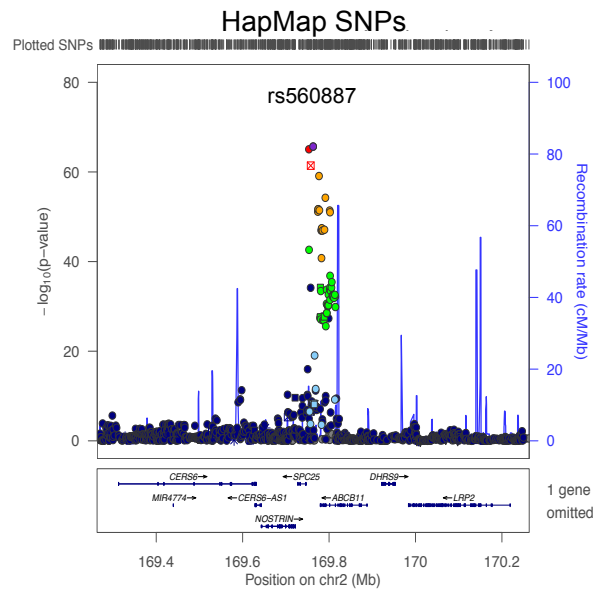

### D FG G6PC2 secondary signal

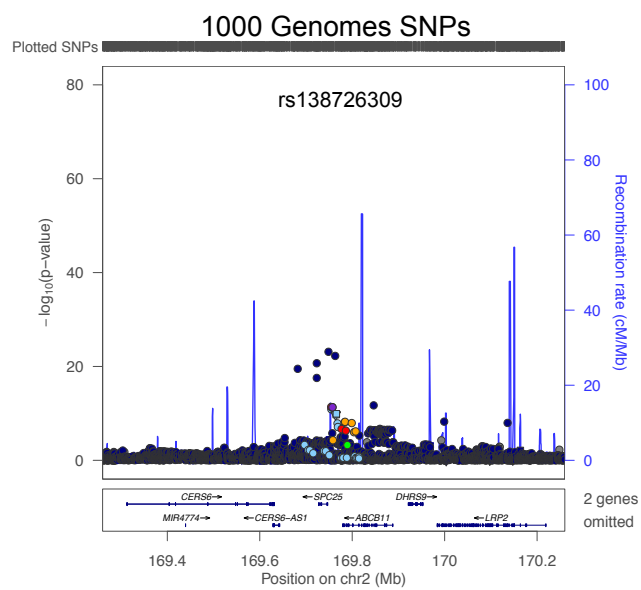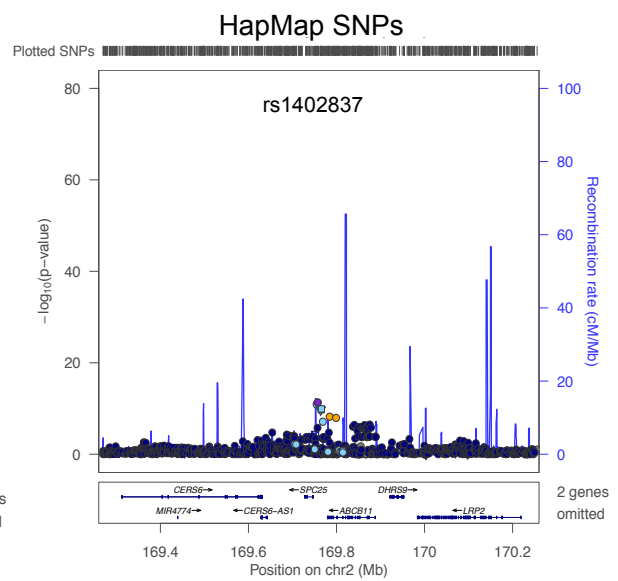

### E FG GCK primary signal

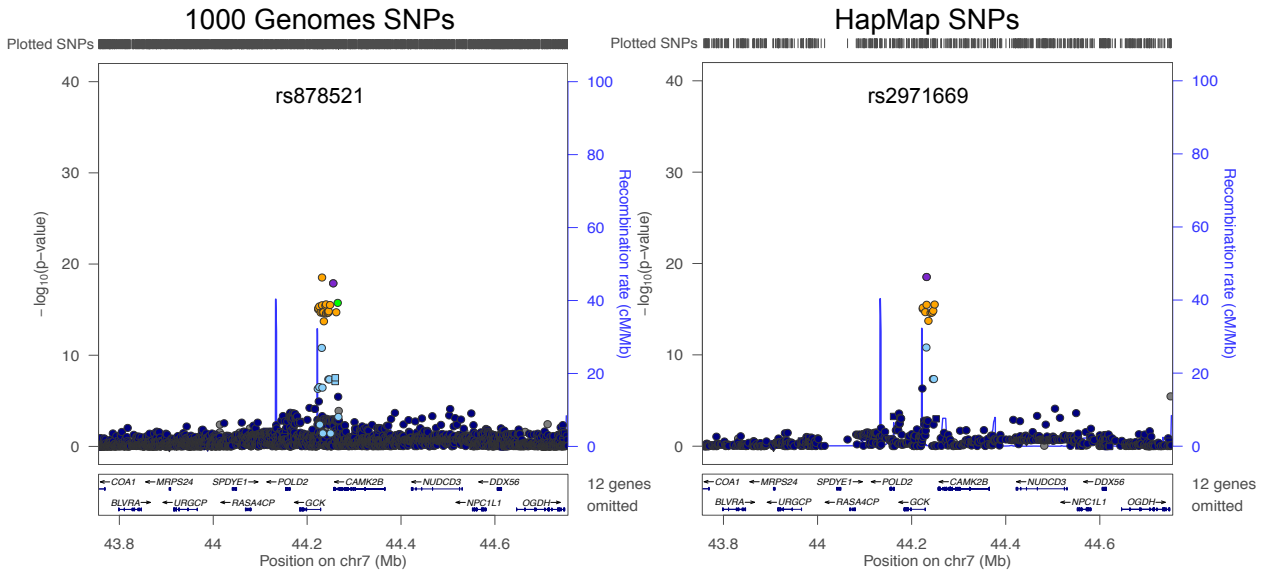

### F FG GCK secondary signal

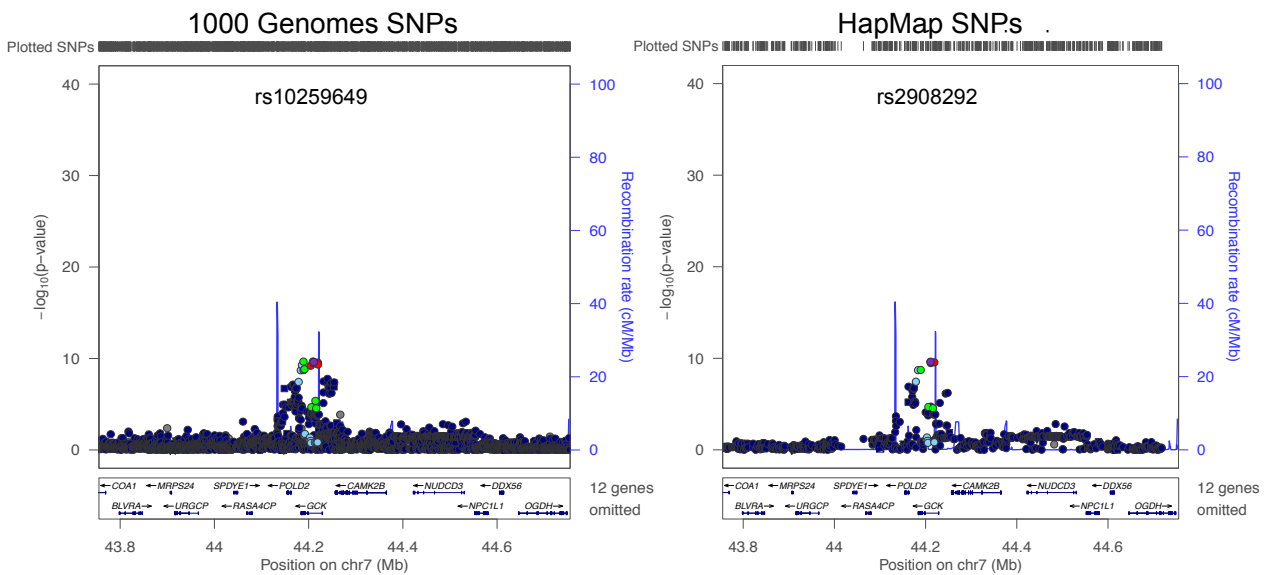

Supplement: pgen.1005230.s008.pdf [file pgen.1005230.s008.pdf]
