# Supplementary material for: Discovery and Fine-Mapping of Glycaemic and Obesity-Related Trait Loci Using High-Density Imputation
Source: PubMed Central journal article supplement (PMC4488845; doi:10.1371/journal.pgen.1005230), 2015-07-01
Supplement: pgen.1005230.s011.pdf [file pgen.1005230.s011.pdf]

**S1 Table. Cohort summary information on sample quality control, genotyping, imputation and statistical analysis method.**

| 1. Study information |                    |                                  | 2. Sample                         |                                        |           | 3. Genotyping                                                                             |                                                                              |                                  |                     | 4. Imputation | 5. Association analysis |                                 |                                                               |                   |
|----------------------|--------------------|----------------------------------|-----------------------------------|----------------------------------------|-----------|-------------------------------------------------------------------------------------------|------------------------------------------------------------------------------|----------------------------------|---------------------|---------------|-------------------------|---------------------------------|---------------------------------------------------------------|-------------------|
| Study                | Study type         | Ethnic group (country of origin) | Sample size (% males / % females) | Age (mean (SD); males /females)        | Sample QC |                                                                                           | Genotyping array                                                             | SNP QC                           |                     |               | Software                | Population structure adjustment | Analysis of related individuals                               | Software          |
|                      |                    |                                  |                                   |                                        | Call rate | Exclusion criteria                                                                        |                                                                              | HWE-p                            | Call rate           | MAF           |                         |                                 |                                                               |                   |
| 58BC-WTCCC           | Population based   | European (UK)                    | 2802 (52%/48%)                    | 45.0 (0.0)/ 45.0 (0.0)                 | 95%       | Heterozygosity, gender check and relatedness                                              | Affy6.0 & Illumina 1M                                                        | 1x10 <sup>-6</sup>               | 95% (99% if MAF<5%) | 1%            | IMPUTE2                 | None                            | No related individuals                                        | SNPTest           |
| 58BC-DIL             | Population based   | European (UK)                    | 2573 (49%/51%)                    | 45.0 (0.0)/ 45.0 (0.0)                 | 95%       | Heterozygosity, gender check and relatedness                                              | Illumina HumanHap550                                                         | 1x10 <sup>-6</sup>               | 95% (99% if MAF<5%) | 1%            | IMPUTE2                 | None                            | No related individuals                                        | SNPTest           |
| deCODE               | Population based   | European (Iceland)               | 33138 (34%/66%)                   | 62.7 (16.5)/ 57.1 (18.3)               | 98%       | NA                                                                                        | Illumina Human Hap and Omni chips                                            | NA                               | NA                  | NA            | deCODEs own software    | None                            | Data has relatives but relatedness was not taken into account | SNPTest           |
| DGI                  | T2D case control   | European (Sweden and Finland)    | 3005 (50%/50%)                    | 61.0 (10.6)/ 62.5 (10.7)               | 95%       | Sequenom fingerprint profile, gender check and relatedness                                | Affymetrix GeneChip® 500K                                                    | 1x10 <sup>-6</sup>               | 95%                 | 1%            | IMPUTE2                 | Birth place                     | Data has relatives but relatedness was not taken into account | SNPTest           |
| EGCUT_370            | Population based   | European (Estonia)               | 2313 (48%/52%)                    | 38.8 (16.3)/ 40.5 (15.9)               | 95%       | Gender check, relatedness and MDS outlier                                                 | Illumina HumanHap 300                                                        | 1x10 <sup>-6</sup>               | 95%                 | 1%            | IMPUTE2                 | None                            | Data has relatives but relatedness was not taken into account | SNPTest           |
| EGCUT_omniX          | Population based   | European (Estonia)               | 4358 (57%/43%)                    | 50.9 (19.7)/ 48.7 (19.3)               | 95%       | Gender check, relatedness and MDS outlier                                                 | Illumina Human OmniExpress                                                   | 1x10 <sup>-6</sup>               | 95%                 | 1%            | IMPUTE2                 | None                            | Data has relatives but relatedness was not taken into account | SNPTest           |
| FINRISK              | Other              | European (Finland)               | 1560 (58%/42%)                    | 55.5 (11.5)/ 60.3 (9.7)                | 95%       | Heterozygosity, gender check and relatedness                                              | Illumina Human610-Quad                                                       | 1x10 <sup>-6</sup>               | 95% (99% if MAF<5%) | 1%            | IMPUTE2                 | PCA                             | No related individuals                                        | SNPTest           |
| FTC                  | Population based   | European (Finland)               | 532 (51%/49%)                     | 23.0 (1.5)/ 22.7 (1.2)                 | 95%       | Heterozygosity, gender check and relatedness                                              | Illumina Human670-QuadCustom                                                 | 1x10 <sup>-6</sup>               | 95% (99% if MAF<5%) | 1%            | IMPUTE2                 | PCA                             | No related individuals                                        | SNPTest           |
| GenMets              | Other case control | European (Finland)               | 1670 (49% 51%)                    | 49.2 (10.5)/ 42.4 (11.6) , 51.8 (11.5) | 95%       | Heterozygosity, gender check and relatedness                                              | Illumina Human610-Quad                                                       | 1x10 <sup>-6</sup>               | 95% (99% if MAF<5%) | 1%            | IMPUTE2                 | PCA                             | No related individuals                                        | SNPTest           |
| GerMIFSI             | CAD case control   | European (Germany)               | 553 (72%/28%)                     | 48.5 (7.5)/ 52.4 (8.8)                 | 97%       | NA                                                                                        | Affymetrix GeneChip® 500K                                                    | 1x10 <sup>-4</sup> (in controls) | 98%                 | 1%            | IMPUTE2                 | None                            | No related individuals                                        | SNPTest           |
| GerMIFSI             | CAD case control   | European (Germany)               | 388 (72%/28%)                     | 51.4 (8.5)/ 53.8 (8.6)                 | 98%       | NA                                                                                        | Affymetrix Human SNP Array 6.0                                               | 1x10 <sup>-4</sup> (in controls) | 98%                 | 1%            | IMPUTE2                 | None                            | No related individuals                                        | SNPTest           |
| GRAPHIC              | Population based   | European (England)               | 1017 (50%/50%)                    | 53.8 (4.3)/ 51.9 (4.4)                 | 95%       | Gender check                                                                              | Illumina Human OmniExpress                                                   | 1x10 <sup>-6</sup>               | 95% (99% if MAF<5%) | 1%            | IMPUTE2                 | None                            | No related individuals                                        | SNPTest           |
| HBCS                 | Population based   | European (Finland)               | 1619 (43%/57%)                    | 61.4 (2.8)/ 61.6 (3.0)                 | 95%       | Heterozygosity, gender check and relatedness                                              | Illumina Human670-QuadCustom                                                 | 1x10 <sup>-6</sup>               | 95% (99% if MAF<5%) | 1%            | IMPUTE2                 | PCA                             | No related individuals                                        | SNPTest           |
| KORA F4              | population based   | European (Germany)               | 1996 (49%/51%)                    | 55.8 (9.9)/ 55.0 (9.8)                 | 93%       | Gender check                                                                              | Affymetrix Human SNP Array 6.0                                               | 5.7x10 <sup>-7</sup>             | 95% (99% if MAF<5%) | 1%            | IMPUTE2                 | None                            | No related individuals                                        | SNPTest, ProbABEL |
| LLS                  | Other              | European (The Netherlands)       | 2005 (45%/55%)                    | 60.0 (6.7)/ 58.6 (6.6)                 | 95%       | Gender check and relatedness                                                              | Illumina Human660W-Quad and Illumina OmniExpress                             | 1x10 <sup>-4</sup>               | 95%                 | 1%            | IMPUTE 2                | None                            | Relatedness modelled                                          | QT Assoc          |
| NFBC1966             | Population based   | European (Finland)               | 5276 (48%/52%)                    | 31.0 (0.0)/ 31.0 (0.0)                 | 95%       | Duplicates, consent withdrawal, heterozygosity, gender check and relatedness, MDS outlier | Illumina HumanCNV-370DUO                                                     | 5.7x10 <sup>-7</sup>             | 95% (99% if MAF<5%) | 1%            | IMPUTE2                 | PCA                             | No related individuals                                        | SNPTest           |
| NTR/NESDA            | Population based   | European (The Netherlands)       | 7178 (37%/63%)                    | 43.9 (15.3)/ 41.8 (14.0)               | 90%       | Heterozygosity, gender check and relatedness                                              | Illumina 370K, Quad 6.0, Omni 1M, Affymetrix 6.0 and Perlegen-Affymetrix 5.0 | 1x10 <sup>-5</sup>               | 95%                 | 1%            | IMPUTE2                 | None                            | Relatedness modelled                                          | PLINK             |
| PIVUS                | Population based   | European (Sweden)                | 949 (50%/50%)                     | 70.1 (0.17)/ 70.3 (0.17)               | 95%       | Heterozygosity, gender check and relatedness                                              | Merged Metabochip and Illumina OmniExpress                                   | 1x10 <sup>-6</sup>               | 95% (99% if MAF<5%) | 1%            | IMPUTE2                 | PCA                             | No related individuals                                        | SNPTest           |
| RS1                  | Population based   | European (The Netherlands)       | 5745 (41%/59%)                    | 68.1 (8.2)/ 70.3 (9.6)                 | 98%       | Heterozygosity, gender check, relatedness and ethnic outliers                             | Illumina 550 and 610K                                                        | 1x10 <sup>-6</sup>               | 98%                 | 1%            | Minimac                 | None                            | No related individuals                                        | ProbABEL          |
| Twingene             | Population based   | European (Sweden)                | 5898 (48%/52%)                    | 65.7 (8.2)/ 64.6 (8.4)                 | 97%       | Heterozygosity, gender check and relatedness                                              | Illumina Human OmniExpress                                                   | 1x10 <sup>-7</sup>               | 97%                 | 1%            | IMPUTE2                 | PCA                             | No related individuals                                        | SNPTest           |
| ULSAM                | Population based   | European (Sweden)                | 1116 (100% /0%)                   | 71.0 (0.63)/                           | 95%       | Heterozygosity, gender check and relatedness                                              | Merged Metabochip and Illumina Omni 2.5M                                     | 1x10 <sup>-6</sup>               | 95% (99% if MAF<5%) | 1%            | IMPUTE2                 | PCA                             | No related individuals                                        | SNPTest           |
| YFS                  | Population based   | European (Finland)               | 1989 (46%/54%)                    | 37.6 (5.1)/ 37.6 (5.1)                 | 95%       | Heterozygosity, gender check and relatedness                                              | Illumina Human670-QuadCustom                                                 | 1x10 <sup>-6</sup>               | 95% (99% if MAF<5%) | 1%            | IMPUTE2                 | PCA                             | No related individuals                                        | SNPTest           |
