# Supplementary material for: Discovery and Fine-Mapping of Glycaemic and Obesity-Related Trait Loci Using High-Density Imputation
Source: PubMed Central journal article supplement (PMC4488845; doi:10.1371/journal.pgen.1005230), 2015-07-01
Supplement: pgen.1005230.s012.pdf [file pgen.1005230.s012.pdf]

**S2 Table. Summary of obesity-related traits in each study.**

| Study            | BMI                            |                              |                                           |                                              | WHR <sub>adjBMI</sub>          |                              |                                                 |                                              |
|------------------|--------------------------------|------------------------------|-------------------------------------------|----------------------------------------------|--------------------------------|------------------------------|-------------------------------------------------|----------------------------------------------|
|                  | Sample size<br>(males/females) | mean (SD)<br>(males/females) | Adjustments                               | Genomic control<br>lambda<br>(males/females) | Sample size<br>(males/females) | mean (SD)<br>(males/females) | Adjustments                                     | Genomic control<br>lambda<br>(males/females) |
| 58BC-WTCCC       | 1453/1349                      | 27.8 (4.3) / 26.8 (5.4)      | none                                      | 1.00/0.99                                    | 1449/1344                      | 0.93 (0.058) / 0.81 (0.061)  | BMI                                             | 0.98/1.00                                    |
| 58BC-DIL         | 1247/1326                      | 28.0 (4.2) / 27.0 (5.6)      | none                                      | 0.99/0.99                                    | 1243/1318                      | 0.93 (0.061) / 0.81 (0.063)  | BMI                                             | 0.99/1.00                                    |
| deCODE           | 11187/21951                    | 27.8 (4.8) / 26.8 (5.5)      | age + age <sup>2</sup>                    | 1.19/1.32                                    | 3125/4009                      | 0.96 (0.090) / 0.89 (0.009)  | age + age <sup>2</sup> + BMI                    | 1.05/1.09                                    |
| DGI cases        | 777/753                        | 28.2 (3.9) / 28.8 (4.9)      | age + age <sup>2</sup> + center           | 1.00/1.01                                    | 581/557                        | 0.99 (0.063) / 0.89 (0.072)  | age + age <sup>2</sup> + BMI + center           | 1.00/1.01                                    |
| DGI controls     | 713/762                        | 26.6 (3.2) / 26.7 (4.2)      | age + age <sup>2</sup> + center           | 1.00/1.01                                    | 385/435                        | 0.96 (0.063) / 0.84 (0.066)  | age + age <sup>2</sup> + BMI + center           | 1.00/1.01                                    |
| EGCUT_370        | 1115/1198                      | 25.9 (4.4) / 25.5 (5.6)      | age + age <sup>2</sup>                    | 0.98/1.00                                    | 608/699                        | 0.88 (0.080) / 0.79 (0.075)  | age + age <sup>2</sup> + BMI                    | 1.00/1.00                                    |
| EGCUT_omniX      | 2469/1889                      | 26.8 (4.8) / 26.6 (5.7)      | age + age <sup>2</sup>                    | 0.99/0.99                                    | 2095/1569                      | 0.93 (0.120) / 0.82 (0.082)  | age + age <sup>2</sup> + BMI                    | 1.03/1.00                                    |
| FINRISK          | 902/658                        | 27.3 (4.0) / 27.0 (5.0)      | age + age <sup>2</sup>                    | 0.99/1.01                                    | 912/659                        | 0.96 (0.070) / 0.84 (0.007)  | age + age <sup>2</sup> + BMI                    | 0.99/1.00                                    |
| FTC              | 259/273                        | 23.8 (3.4) / 22.6 (3.8)      | age + age <sup>2</sup>                    | 1.02/1.00                                    | NA                             | NA                           | NA                                              | NA                                           |
| GenMets Cases    | 415/410                        | 29.5 (3.6) / 29.8 (4.9)      | age + age <sup>2</sup> + 3 PCs            | 0.99/1.00                                    | 415/410                        | 1.0 (0.0043) / 0.89 (0.052)  | age + age <sup>2</sup> + BMI + 3 PCs            | 1.01/1.00                                    |
| GenMets Controls | 408/437                        | 25.3 (3.1) / 25.1 (4.1)      | age + age <sup>2</sup> + 3 PCs            | 1.02/1.01                                    | 407/436                        | 0.95 (0.054) / 0.84 (0.055)  | age + age <sup>2</sup> + BMI + 3 PCs            | 1.01/1.01                                    |
| GerMIFSI         | 399/154                        | 27.4 (3.4) / 27.1 (4.2)      | age + age <sup>2</sup>                    | 1.13/1.12                                    | NA                             | NA                           | NA                                              | NA                                           |
| GerMIFSI         | 286/102                        | 27.4 (3.3) / 28.5 (4.3)      | age + age <sup>2</sup>                    | 1.09/1.06                                    | NA                             | NA                           | NA                                              | NA                                           |
| GRAPHIC          | 508/509                        | 27.8 (3.9) / 27.1 (4.6)      | age + age <sup>2</sup>                    | 1.01/0.98                                    | 503/501                        | 0.93 (0.070) / 0.81 (0.060)  | age + age <sup>2</sup> + BMI                    | 1.00/0.99                                    |
| HBCS             | 702/917                        | 27.6 (4.3) / 27.8 (5.1)      | age + age <sup>2</sup>                    | 1.01/0.99                                    | 701/915                        | 0.99 (0.065) / 0.87 (0.078)  | age + age <sup>2</sup> + BMI                    | 1.00/1.00                                    |
| KORA F4          | 979/1017                       | 28.0 (3.9) / 27.5 (5.0)      | age + age <sup>2</sup>                    | 0.99/0.98                                    | 979/1017                       | 0.95 (0.055) / 0.82 (0.063)  | age + age <sup>2</sup> + BMI                    | 1.02/1.00                                    |
| LLS              | 904/1101                       | 25.8 (3.0) / 25.1 (3.9)      | age + age <sup>2</sup>                    | 1.01/1.03                                    | 327/328                        | 0.97 (0.065) / 0.91 (0.066)  | age + age <sup>2</sup> + BMI                    | 1.00/1.03                                    |
| NFBC1966         | 2523/2753                      | 25.2 (3.6) / 24.2 (4.7)      | 3 PCs                                     | 1.00/1.01                                    | 2243/2297                      | 0.91 (0.058) / 0.81 (0.078)  | BMI + 3 PCs                                     | 1.01/0.99                                    |
| NTR/NESDA        | 2665/4513                      | 25.5 (3.8) / 25.0 (4.7)      | age + age <sup>2</sup> + platform + study | 1.01/1.01                                    | 2665/4513                      | 0.89 (0.081) / 0.80 (0.079)  | age + age <sup>2</sup> + BMI + platform + study | 1.04/1.02                                    |
| PIVUS            | 474/475                        | 27.0 (3.7) / 27.1 (4.9)      | age + age <sup>2</sup> + PC1 + PC2        | 1.00/1.00                                    | 469/469                        | 0.94 (0.064) / 0.86 (0.061)  | age + age <sup>2</sup> + BMI + 2 PCs            | 0.99/1.01                                    |
| RS1              | 2372/3373                      | 25.7 (3.0) / 26.7 (4.1)      | age + age <sup>2</sup>                    | 1.02/1.02                                    | 2266/3202                      | 0.96 (0.071) / 0.87 (0.088)  | age + age <sup>2</sup> + BMI                    | 1.00/1.02                                    |
| Twingene         | 2780/3118                      | 25.6 (3.3) / 24.7 (4.0)      | age + age <sup>2</sup>                    | 0.99/1.00                                    | 2763/3102                      | 0.94 (0.15) / 0.83 (0.078)   | age + age <sup>2</sup> + BMI                    | 0.99/1.00                                    |
| ULSAM            | 1116/-                         | 26.3 (3.4) / NA              | age + age <sup>2</sup> + 2 PCs            | 1.01/NA                                      | 1097/NA                        | 0.95 (0.053) / NA            | age + age <sup>2</sup> + BMI + 2 PCs            | 1.00/NA                                      |
| YFS              | 908/1081                       | 26.8 (4.3) / 25.3 (5.0)      | age + age <sup>2</sup> + 3 PCs            | 1.01/1.00                                    | 913/1086                       | 0.94 (0.070) / 0.83 (0.071)  | age + age <sup>2</sup> + BMI + 3 PCs            | 1.00/1.00                                    |

PC, principal component.
