# Supplementary material for: Discovery and Fine-Mapping of Glycaemic and Obesity-Related Trait Loci Using High-Density Imputation
Source: PubMed Central journal article supplement (PMC4488845; doi:10.1371/journal.pgen.1005230), 2015-07-01
Supplement: pgen.1005230.s013.pdf [file pgen.1005230.s013.pdf]

**S3 Table. Summary of fasting glycaemic traits in each study.**

| Study            | Samples with glucose phenotype |                                           |            |                         |                              | Samples with insulin phenotype |                                      |           |                             |                              | Sample exclusion criteria                                                                              |
|------------------|--------------------------------|-------------------------------------------|------------|-------------------------|------------------------------|--------------------------------|--------------------------------------|-----------|-----------------------------|------------------------------|--------------------------------------------------------------------------------------------------------|
|                  | Measurements                   | Adjustments                               | N (M/F)    | mean (SD), mmol/l (M/F) | Genomic control lambda (M/F) | Measurements                   | Adjustments                          | N (M/F)   | mean (SD), pmol/l           | Genomic control lambda (M/F) |                                                                                                        |
| deCODE           | Fasting plasma                 | age + age <sup>2</sup>                    | 6902/10695 | 5.3 (0.55) / 5.1 (0.55) | 1.26/1.16                    | Fasting serum                  | age + age <sup>2</sup> + BMI         | 682/1149  | 77.9 (68.6) / 70.8 (53.6)   | 1.17/1.21                    | Individuals with Diabetes (T2D, T1D), and/or FPG >=7 mmol/l, diabetic treatment                        |
| DGI controls     | Fasting plasma                 | age + center                              | 705/749    | 5.3 (0.56) / 5.3 (0.53) | 1.02/1.00                    | Fasting serum                  | age + center + BMI                   | 663/712   | 38.3 (41.2) / 33.3 (22.7)   | 1.00/1.00                    | Individuals with Diabetes                                                                              |
| GenMets Cases    | Fasting plasma                 | age + age <sup>2</sup> + 3 PCs            | 408/403    | 5.5 (0.50) / 5.5 (0.50) | 1.00/1.00                    | Fasting plasma                 | age + age <sup>2</sup> + BMI + 3 PCs | 400/396   | 85.8 (62.8) / 75.2 (41.8)   | 1.00/1.00                    | FG >= 7 mmol/l                                                                                         |
| GenMets Controls | Fasting plasma                 | age + age <sup>2</sup> + 3 PCs            | 404/435    | 5.3 (0.46) / 5.1 (0.40) | 0.98/0.99                    | Fasting plasma                 | age + age <sup>2</sup> + BMI + 3 PCs | 386/426   | 44.5 (23.0) / 42.7 (23.6)   | 1.00/1.00                    | FG >= 7 mmol/l                                                                                         |
| HBCS             | Fasting plasma                 | age + age <sup>2</sup>                    | 491/732    | 5.7 (0.54) / 5.4 (0.57) | 1.00/0.99                    | Fasting plasma                 | age + age <sup>2</sup> + BMI         | 703/917   | 82.0 (62.3) / 70.6 (8.43)   | 1.00/1.00                    | FG >= 7 mmol/l                                                                                         |
| KORA F4          | Fasting blood                  | age + age <sup>2</sup>                    | 744/863    | 6.1 (0.47) / 5.8 (0.51) | 1.00/1.00                    | Fasting blood                  | age + BMI                            | 867/925   | 65.0 (135.7) / 58.1 (204.9) | 0.89/0.88                    | Individuals with Diabetes (T2D, T1D), diabetes treatment, and/or FPG >=7 mmol/l, non-fasting, pregnant |
| NFBC1966         | Fasting blood                  | 3 PCs                                     | 2273/2413  | 5.8 (0.45) / 5.5 (0.45) | 1.00/0.99                    | Fasting Serum                  | BMI + 3PCs                           | 2255/2398 | 48.4 (14.9) / 44.0 (14.8)   | 0.99/0.99                    | Individuals with Diabetes (T2D, T1D), and/or FPG >=7 mmol/l, diabetic treatment                        |
| NTR/NESDA        | Fasting plasma                 | age + age <sup>2</sup> + platform + study | 2355/4175  | 5.4 (0.54) / 5.2 (0.55) | 0.99/1.04                    | Fasting plasma                 | age + age <sup>2</sup> + platform    | 1836/3023 | 65.9 (42.4) / 62.3 (37.8)   | 1.05/1.01                    | Diabetes, FG > 7mmol/l                                                                                 |
| PIVUS            | Fasting plasma                 | age + age <sup>2</sup> + 2 PCs            | 409/429    | 5.0 (0.50) / 4.9 (0.49) | 0.99/1.01                    | Fasting serum                  | age + age <sup>2</sup> + BMI + 2PCs  | 409/429   | 59.6 (34.3) / 56.7 (33.8)   | 0.99/1.01                    | Individuals with Diabetes (T2D, T1D), and/or FPG >=7 mmol/l, non-fasting, diabetic treatment, pregnant |
| RS1              | Fasting serum                  | age                                       | 1251/1713  | 5.6 (0.52) / 5.5 (0.56) | 0.99/1.05                    | Fasting serum                  | age + BMI                            | 1216/1697 | 72.6 (48.5) / 80.9 (61.2)   | 1.05/1.02                    | Individuals with diabetes                                                                              |
| Twingene         | Fasting serum                  | age + age <sup>2</sup>                    | 2337/2925  | 6.0 (0.52) / 5.8 (0.50) | 0.96/0.97                    | NA                             | NA                                   | NA        | NA                          | NA                           | Individuals with Diabetes (T2D, T1D), FG > 7 mmol/l                                                    |
| ULSAM            | Fasting plasma                 | age + age <sup>2</sup> + PC1 + PC2        | 938/NA     | 5.3 (0.52) / NA         | 0.99/NA                      | Fasting serum                  | age + age <sup>2</sup> + BMI + 2PCs  | 927/NA    | 83.3 (45.0) / NA            | 1.01/NA                      | Individuals with Diabetes (T2D, T1D), and/or FPG >=7 mmol/l, non-fasting                               |
| YFS              | Fasting plasma                 | age + age <sup>2</sup> + 3 PCs            | 824/1059   | 6.1 (0.45) / 5.8 (0.47) | 0.99/1.00                    | Fasting plasma                 | age + age <sup>2</sup> + BMI + 3 PCs | 883/1062  | 65.5 (53.6) / 59.6 (46.2)   | 0.98/0.99                    | FG >= 7 mmol/l                                                                                         |

M, males; F, females. PC, principal component. FPG, fasting plasma glucose. T2D, type 2 diabetes; T1D, type 1 diabetes.
