# Supplementary material for: Discovery and Fine-Mapping of Glycaemic and Obesity-Related Trait Loci Using High-Density Imputation
Source: PubMed Central journal article supplement (PMC4488845; doi:10.1371/journal.pgen.1005230), 2015-07-01
Supplement: pgen.1005230.s014.pdf [file pgen.1005230.s014.pdf]

**S4 Table. Comparison of the SNP coverage between 1000 Genomes imputation and HapMap imputation in 1958 British Birth Cohort from the Wellcome Trust Case Control Consortium (a) and 1966 Northern Finnish Birth Cohort (b).**

**a. 1958 British Birth Cohort from the Wellcome Trust Case Control Consortium (n=2,802)**

| Minor allele frequency (MAF) <sup>a</sup> | 1000 Genomes imputed |                                                    |                 | HapMap imputed    |                                                    |                 |
|-------------------------------------------|----------------------|----------------------------------------------------|-----------------|-------------------|----------------------------------------------------|-----------------|
|                                           | No. of total SNPs    | No. of well-imputed SNPs (proportion) <sup>b</sup> | Mean INFO score | No. of total SNPs | No. of well-imputed SNPs (proportion) <sup>b</sup> | Mean INFO score |
| 0.001≤MAF<0.005                           | 3,440,835            | 2,771,080 (0.81)                                   | 0.73            | 120,551           | 110,687 (0.03)                                     | 0.87            |
| 0.005≤MAF<0.01                            | 1,163,531            | 1,100,625 (0.95)                                   | 0.79            | 176,151           | 54,156 (0.05)                                      | 0.90            |
| 0.01≤MAF<0.02                             | 1,120,045            | 1,092,438 (0.98)                                   | 0.84            | 93,920            | 93,452 (0.08)                                      | 0.95            |
| 0.02≤MAF<0.03                             | 655,242              | 644,194 (0.98)                                     | 0.88            | 83,032            | 82,921 (0.13)                                      | 0.97            |
| 0.03≤MAF<0.04                             | 472,084              | 464,280 (0.98)                                     | 0.91            | 77,228            | 77,186 (0.16)                                      | 0.98            |
| 0.04≤MAF<0.05                             | 380,952              | 375,469 (0.99)                                     | 0.92            | 75,728            | 75,691 (0.20)                                      | 0.98            |
| MAF≥0.05                                  | 6,308,553            | 6,229,729 (0.99)                                   | 0.96            | 2,300,971         | 2,300,523 (0.36)                                   | 0.99            |
| Total                                     | 37,421,795           | 13,880,317                                         |                 | 3,557,113         | 2,878,356                                          |                 |

**b. 1966 Northern Finish Birth Cohort (n=5,276)**

| Minor allele frequency (MAF) <sup>a</sup> | 1000 Genomes imputed |                                                    |                 | HapMap imputed    |                                                    |                 |
|-------------------------------------------|----------------------|----------------------------------------------------|-----------------|-------------------|----------------------------------------------------|-----------------|
|                                           | No. of total SNPs    | No. of well-imputed SNPs (proportion) <sup>b</sup> | Mean INFO score | No. of total SNPs | No. of well-imputed SNPs (proportion) <sup>b</sup> | Mean INFO score |
| 0.001≤MAF<0.005                           | 3,148,071            | 1,975,647 (0.63)                                   | 0.69            | 131,254           | 90,404 (0.03)                                      | 0.73            |
| 0.005≤MAF<0.01                            | 1,103,729            | 966,056 (0.88)                                     | 0.77            | 65,946            | 60,145 (0.05)                                      | 0.82            |
| 0.01≤MAF<0.02                             | 1,112,612            | 1,063,907 (0.96)                                   | 0.83            | 99,959            | 97,628 (0.09)                                      | 0.88            |
| 0.02≤MAF<0.03                             | 666,994              | 654,475 (0.98)                                     | 0.87            | 86,380            | 85,812 (0.13)                                      | 0.91            |
| 0.03≤MAF<0.04                             | 476,400              | 470,302 (0.99)                                     | 0.90            | 79,728            | 79,498 (0.17)                                      | 0.93            |
| 0.04≤MAF<0.05                             | 375,166              | 371,714 (0.99)                                     | 0.91            | 75,948            | 75,796 (0.20)                                      | 0.95            |
| MAF≥0.05                                  | 5,938,415            | 5,918,942 (1.00)                                   | 0.96            | 2,284,446         | 2,283,784 (0.38)                                   | 0.98            |
| Total                                     | 36,649,906           | 12,366,741                                         |                 | 3,424,576         | 2,815,081                                          |                 |

<sup>a</sup> MAF is based on MAF calculated in each study.

<sup>b</sup> Proportion is calculated as the N (SNPs with INFO score ≥ 0.4) divided by the N (SNPs present in the 1000 Genomes EUR samples) in each MAF bin. INFO, imputation quality score derived by IMPUTE2.
