# Supplementary material for: Discovery and Fine-Mapping of Glycaemic and Obesity-Related Trait Loci Using High-Density Imputation
Source: PubMed Central journal article supplement (PMC4488845; doi:10.1371/journal.pgen.1005230), 2015-07-01
Supplement: pgen.1005230.s015.pdf [file pgen.1005230.s015.pdf]

**S5 Table. Overlap of study samples between GIANT, MAGIC and current ENGAGE consortium.**

| Study            | BMI                                          |                                          |                     | WHR <sub>adjBMI</sub>                   |                                            |                     | FG                                        |                                          |                     | F <sub>adjBMI</sub>                       |                                          |                     |
|------------------|----------------------------------------------|------------------------------------------|---------------------|-----------------------------------------|--------------------------------------------|---------------------|-------------------------------------------|------------------------------------------|---------------------|-------------------------------------------|------------------------------------------|---------------------|
|                  | GIANT <sup>a</sup> Speliotes et al. (ref 17) | GIANT <sup>b</sup> Locke et al. (ref 26) | ENGAGE <sup>c</sup> | GIANT <sup>a</sup> Heid et al. (ref 18) | GIANT <sup>b</sup> Shungin et al. (ref 27) | ENGAGE <sup>c</sup> | MAGIC <sup>a</sup> Dupuis et al. (ref 16) | MAGIC <sup>b</sup> Scott et al. (ref 19) | ENGAGE <sup>c</sup> | MAGIC <sup>a</sup> Dupuis et al. (ref 16) | MAGIC <sup>b</sup> Scott et al. (ref 19) | ENGAGE <sup>c</sup> |
|                  | Sample size (overlap)                        | Sample size (overlap)                    | Sample size         | Sample size (overlap)                   | Sample size (overlap)                      | Sample size         | Sample size (overlap)                     | Sample size (overlap)                    | Sample size         | Sample size (overlap)                     | Sample size (overlap)                    | Sample size         |
| 58BC-WTCCC       | 1,479 (1,479)                                | 1,479 (1,479)                            | 2,802               | 1,422 (1,422)                           | 1,422 (1,422)                              | 2,793               |                                           |                                          |                     |                                           |                                          |                     |
| 58BC-DIL         | 2,587 (2,573)                                | 2,587 (2,587)                            | 2,573               | 2,490 (2,490)                           | 2,592 (2,561)                              | 2,561               |                                           |                                          |                     |                                           |                                          |                     |
| deCODE           | 26,799 (26,799)                              | 26,799 (26,799)                          | 33,138              | 5,883 (5,883)                           | 5,513 (5,513)                              | 7,134               | 6,059 (6,059)                             | 6,059 (6,059)                            | 17,597              | 1574 (1574)                               | 1574 (1574)                              | 1831                |
| DGI cases        | 1,317 (1,317)                                | 1,317 (1,317)                            | 1,530               | 958 (958)                               | 958 (958)                                  | 1,138               |                                           |                                          |                     |                                           |                                          |                     |
| DGI controls     | 1,088 (1,088)                                | 1,088 (1,088)                            | 1,475               | 469 (469)                               | 469 (469)                                  | 820                 | 1,467 (1,454)                             | 1,467 (1,454)                            | 1,454               | 1388 (1375)                               | 1388 (1375)                              | 1375                |
| EGCUT_370        |                                              | 866 (866)                                | 2,313               |                                         | 866 (866)                                  | 1,307               |                                           | 671 (0)                                  |                     |                                           |                                          |                     |
| EGCUT_omniX      |                                              | 1,356 (1,356)                            | 4,358               |                                         | 1,164 (1,164)                              | 3,664               |                                           |                                          |                     |                                           |                                          |                     |
| FINRISK          |                                              |                                          | 1,560               |                                         |                                            | 1,571               |                                           |                                          |                     |                                           |                                          |                     |
| FTC              | 138 (138)                                    | 125 (125)                                | 532                 | 138 (0)                                 | 138 (0)                                    |                     |                                           |                                          |                     |                                           |                                          |                     |
| GenMets Cases    | 1,092 (825)                                  | 857 (825)                                | 825                 | 857 (825)                               | 857 (825)                                  | 825                 |                                           |                                          | 811                 |                                           |                                          | 796                 |
| GenMets Controls | 1,171 (845)                                  | 824 (824)                                | 845                 | 869 (843)                               | 869 (843)                                  | 843                 |                                           |                                          | 839                 |                                           |                                          | 812                 |
| GerMIFSI         | 600 (553)                                    | 600 (553)                                | 553                 |                                         |                                            |                     |                                           |                                          |                     |                                           |                                          |                     |
| GerMIFSIII       | 1,124 (388)                                  | 1,124 (388)                              | 388                 |                                         |                                            |                     |                                           |                                          |                     |                                           |                                          |                     |
| GRAPHIC          |                                              |                                          | 1,017               |                                         |                                            | 1,004               |                                           |                                          |                     |                                           |                                          |                     |
| HBCS             |                                              | 1,726 (1,619)                            | 1,619               |                                         | 1,723 (1,616)                              | 1,616               |                                           |                                          | 1,223               |                                           |                                          | 1620                |
| KORA F4          | 1,814 (1,814)                                | 1,811 (1,811)                            | 1,996               | 1,814 (1,814)                           | 1,814 (1,814)                              | 1,996               | 458 (458)                                 | 2,634 (1,607)                            | 1,607               | 435 (435)                                 | 871 (871)                                | 1792                |
| LLS              |                                              | 1,903 (1,903)                            | 2,005               |                                         | 630 (630)                                  | 655                 |                                           |                                          |                     |                                           |                                          |                     |
| NFBC1966         | 4,773 (4,773)                                | 4,497 (4,497)                            | 5,276               | 4,773 (4,540)                           | 4,773 (4,540)                              | 4,540               | 4,255 (4,255)                             | 4,255 (4,255)                            | 4,686               | 4234 (4234)                               | 4234 (4234)                              | 4653                |
| NTR/NESDA        | 3,516 (3,516)                                | 3,516 (3,516)                            | 7,178               | 3,509 (3,509)                           | 3,516 (3,516)                              | 7,178               | 3,122 (3,122)                             | 3,122 (3,122)                            | 6,530               | 1268 (1268)                               | 1268 (1268)                              | 4859                |
| PIVUS            |                                              | 978 (949)                                | 949                 |                                         | 968 (938)                                  | 938                 |                                           | 929 (838)                                | 838                 |                                           | 923 (838)                                | 838                 |
| RS1              | 5,744 (5,744)                                | 5,744 (5,744)                            | 5,745               | 5,468 (5,468)                           | 5,373 (5,373)                              | 5,468               | 2,058 (2,058)                             | 2,058 (2,058)                            | 2,964               | 2781 (2781)                               | 2781 (2781)                              | 2913                |
| Twingene         |                                              | 9,176 (5,898)                            | 5,898               |                                         | 9,123 (5,865)                              | 5,865               |                                           |                                          | 5,262               |                                           |                                          |                     |
| ULSAM            |                                              | 1,112 (1,116)                            | 1,116               |                                         | 1,094 (1,094)                              | 1,097               |                                           | 1,098 (938)                              | 938                 |                                           | 1085 (927)                               | 927                 |
| YFS              |                                              | 1,989 (1,989)                            | 1,989               |                                         | 1,999 (1,999)                              | 1,999               |                                           |                                          | 1,883               |                                           |                                          | 1895                |
| <b>Total</b>     | <b>53,242 (51,852)</b>                       | <b>71,474 (67,249)</b>                   | <b>87,680</b>       | <b>28,650 (28,221)</b>                  | <b>45,861 (42,006)</b>                     | <b>55,012</b>       | <b>17,419 (17,406)</b>                    | <b>22,293 (20,331)</b>                   | <b>46,632</b>       | <b>11,680 (11,667)</b>                    | <b>14,124 (14,026)</b>                   | <b>24,311</b>       |

<sup>a</sup> Combines GWAS data imputed up to HapMap reference panel.

<sup>b</sup> Combines previous GWAS data (HapMap imputed), new GWAS data (HapMap imputed) and Metabochip data.

<sup>c</sup> Combines GWAS data imputed up to 1000 Genomes reference panel.
