# Supplementary material for: Discovery and Fine-Mapping of Glycaemic and Obesity-Related Trait Loci Using High-Density Imputation
Source: PubMed Central journal article supplement (PMC4488845; doi:10.1371/journal.pgen.1005230), 2015-07-01
Supplement: pgen.1005230.s016.pdf [file pgen.1005230.s016.pdf]

**S6 Table. Established loci for glycaemic and obesity-related traits achieving genome-wide significance ( $p < 5 \times 10^{-8}$ ).**

| Trait                 | Locus                         | Lead SNP   | Chr | Position (b37) | Alleles      |      | Male meta-analysis |         |           |        | Female meta-analysis |         |           |        | Sex-combined meta-analysis |                      |                           |        |
|-----------------------|-------------------------------|------------|-----|----------------|--------------|------|--------------------|---------|-----------|--------|----------------------|---------|-----------|--------|----------------------------|----------------------|---------------------------|--------|
|                       |                               |            |     |                | Effect/Other | EAF  | Effect (SE)        | p-value | Q p-value | N      | Effect (SE)          | p-value | Q p-value | N      | Effect (SE)                | p-value              | Sex heterogeneity p-value | N      |
| BMI                   | <i>NEGR1</i>                  | rs11209943 | 1   | 72,750,500     | G/A          | 0.59 | 0.027<br>(0.008)   | 3.9E-04 | 7.8E-01   | 37,287 | 0.030<br>(0.007)     | 1.7E-05 | 1.2E-01   | 49,709 | 0.029<br>(0.005)           | 2.2E-08              | 7.8E-01                   | 86,996 |
| BMI                   | <i>SEC16B</i>                 | rs539515   | 1   | 177,889,025    | C/A          | 0.20 | 0.030<br>(0.009)   | 1.3E-03 | 8.9E-01   | 37,283 | 0.052<br>(0.009)     | 2.5E-09 | 1.8E-01   | 49,679 | 0.042<br>(0.006)           | 7.0E-11              | 1.0E-01                   | 86,962 |
| BMI                   | <i>TMEM18</i>                 | rs66553418 | 2   | 630,902        | T/A          | 0.82 | 0.058<br>(0.010)   | 5.8E-09 | 8.2E-01   | 37,040 | 0.064<br>(0.009)     | 2.0E-12 | 2.5E-01   | 49,340 | 0.062<br>(0.007)           | 6.0E-20              | 6.7E-01                   | 86,380 |
| BMI                   | <i>RBJ-ADCY3-POMC</i>         | rs6749422  | 2   | 25,150,011     | G/C          | 0.45 | 0.022<br>(0.007)   | 3.0E-03 | 3.2E-01   | 37,235 | 0.036<br>(0.007)     | 1.4E-07 | 1.9E-01   | 49,610 | 0.030<br>(0.005)           | 4.0E-09              | 1.6E-01                   | 86,845 |
| BMI                   | <i>ETV5</i>                   | rs9816226  | 3   | 185,834,499    | A/T          | 0.81 | 0.046<br>(0.010)   | 3.0E-06 | 9.3E-01   | 37,249 | 0.036<br>(0.009)     | 5.2E-05 | 2.0E-02   | 49,614 | 0.040<br>(0.007)           | 1.1E-09              | 4.7E-01                   | 86,863 |
| BMI                   | <i>GNPDA2</i>                 | rs12507026 | 4   | 45,181,334     | T/A          | 0.42 | 0.044<br>(0.008)   | 4.8E-08 | 5.5E-01   | 34,736 | 0.038<br>(0.007)     | 2.4E-07 | 8.0E-02   | 46,894 | 0.041<br>(0.005)           | 6.2E-14              | 5.5E-01                   | 81,630 |
| BMI                   | <i>GALNT10</i>                | rs11958496 | 5   | 153,546,602    | G/A          | 0.42 | 0.043<br>(0.009)   | 6.2E-07 | 5.2E-01   | 31382  | 0.040<br>(0.008)     | 1.5E-04 | 8.7E-01   | 41,989 | 0.034<br>(0.005)           | 3.9E-10              | 3.4E-01                   | 79,787 |
| BMI                   | <i>TFAP2B</i>                 | rs3798519  | 6   | 50,788,778     | C/A          | 0.20 | 0.051<br>(0.009)   | 5.0E-08 | 4.0E-01   | 37,269 | 0.040<br>(0.009)     | 5.1E-06 | 4.0E-02   | 49,681 | 0.045<br>(0.006)           | 2.0E-12              | 3.8E-01                   | 86,950 |
| BMI                   | <i>DTX2P1-UPK3BP1-PMS2P11</i> | rs7804790  | 7   | 76,568,075     | C/T          | 0.20 | 0.050<br>(0.013)   | 8.1E-05 | 2.6E-01   | 30,964 | 0.044<br>(0.012)     | 2.6E-04 | 3.6E-01   | 41,956 | 0.045<br>(0.008)           | 2.8x10 <sup>-8</sup> | 4.3E-01                   | 79,335 |
| BMI                   | <i>GRID1</i>                  | rs7903554  | 10  | 87,355,751     | G/C          | 0.07 | 0.065<br>(0.017)   | 8.3E-05 | 1.7E-01   | 34,054 | 0.053<br>(0.015)     | 3.0E-04 | 6.7E-01   | 46,479 | 0.059<br>(0.011)           | 1.7x10 <sup>-8</sup> | 4.5E-01                   | 86,947 |
| BMI                   | <i>BDNF</i>                   | rs4517468  | 11  | 27,688,286     | A/T          | 0.34 | 0.034<br>(0.008)   | 1.6E-05 | 1.6E-01   | 37,262 | 0.037<br>(0.007)     | 4.6E-07 | 3.8E-01   | 49,660 | 0.036<br>(0.005)           | 2.2E-11              | 8.2E-01                   | 86,922 |
| BMI                   | <i>FAIM2</i>                  | rs7132908  | 12  | 50,263,148     | A/G          | 0.38 | 0.040<br>(0.008)   | 2.2E-07 | 4.8E-01   | 37,262 | 0.035<br>(0.007)     | 7.4E-07 | 3.5E-01   | 49,643 | 0.037<br>(0.005)           | 9.6E-13              | 6.5E-01                   | 86,905 |
| BMI                   | <i>NRXN3</i>                  | rs7141420  | 14  | 79,899,454     | T/C          | 0.52 | 0.035<br>(0.007)   | 3.3E-06 | 5.0E-02   | 37,271 | 0.034<br>(0.007)     | 5.2E-07 | 5.4E-01   | 49,674 | 0.035<br>(0.005)           | 8.3E-12              | 9.6E-01                   | 86,945 |
| BMI                   | <i>MAP2K5</i>                 | rs4776972  | 15  | 68,083,436     | A/C          | 0.81 | 0.038<br>(0.010)   | 1.2E-04 | 8.2E-01   | 37,228 | 0.049<br>(0.009)     | 4.3E-08 | 9.4E-01   | 49,591 | 0.044<br>(0.007)           | 4.6E-11              | 4.2E-01                   | 86,819 |
| BMI                   | <i>GPRC5B</i>                 | rs7190603  | 16  | 19,928,662     | T/C          | 0.87 | 0.053<br>(0.011)   | 2.3E-06 | 6.0E-02   | 37,204 | 0.056<br>(0.010)     | 5.4E-08 | 6.2E-01   | 49,457 | 0.055<br>(0.008)           | 4.7E-13              | 8.4E-01                   | 86,661 |
| BMI                   | <i>SH2B1</i>                  | rs2008514  | 16  | 28,825,605     | A/G          | 0.43 | 0.041<br>(0.008)   | 2.7E-07 | 2.9E-01   | 34,720 | 0.033<br>(0.007)     | 5.7E-06 | 1.6E-01   | 46,822 | 0.036<br>(0.005)           | 1.4E-11              | 4.2E-01                   | 81,542 |
| BMI                   | <i>FTO</i>                    | rs55872725 | 16  | 53,809,123     | T/C          | 0.42 | 0.088<br>(0.008)   | 7.8E-29 | 6.9E-01   | 34,727 | 0.072<br>(0.007)     | 3.4E-24 | 2.0E-01   | 46,824 | 0.079<br>(0.005)           | 1.0E-50              | 1.5E-01                   | 81,551 |
| BMI                   | <i>MC4R</i>                   | rs663129   | 18  | 57,838,401     | A/G          | 0.24 | 0.059<br>(0.009)   | 2.8E-11 | 8.4E-01   | 37,258 | 0.054<br>(0.008)     | 2.6E-11 | 2.8E-03   | 49,632 | 0.057<br>(0.006)           | 3.2E-21              | 6.5E-01                   | 86,890 |
| WHR <sub>adjBMI</sub> | <i>LY86</i>                   | rs1294437  | 6   | 6,749,789      | C/T          | 0.66 | 0.031<br>(0.010)   | 1.2E-03 | 3.3E-01   | 25,918 | 0.041<br>(0.009)     | 5.7E-06 | 7.4E-01   | 28,595 | 0.036<br>(0.007)           | 3.0E-08              | 4.3E-01                   | 54,513 |
| WHR <sub>adjBMI</sub> | <i>VEGFA</i>                  | rs6905288  | 6   | 43,758,873     | A/G          | 0.56 | 0.031<br>(0.010)   | 1.3E-03 | 5.9E-01   | 25,927 | 0.055<br>(0.009)     | 1.5E-09 | 1.8E-01   | 28,612 | 0.043<br>(0.007)           | 4.9E-11              | 6.4E-02                   | 54,539 |

|                       |                                          |             |    |             |     |      |                  |         |         |        |                  |         |         |        |                  |         |         |        |
|-----------------------|------------------------------------------|-------------|----|-------------|-----|------|------------------|---------|---------|--------|------------------|---------|---------|--------|------------------|---------|---------|--------|
| WHR <sub>adjBMI</sub> | <i>RSPO3</i>                             | rs72959041  | 6  | 127,454,893 | A/G | 0.08 | 0.077<br>(0.021) | 2.1E-04 | 5.7E-01 | 23,266 | 0.140<br>(0.021) | 1.8E-11 | 1.7E-01 | 24,107 | 0.108<br>(0.015) | 1.7E-13 | 3.4E-02 | 47,373 |
| FG                    | <i>PROX1</i>                             | rs340876    | 1  | 214,158,132 | T/C | 0.55 | 0.022<br>(0.007) | 8.7E-04 | 3.2E-01 | 17,710 | 0.031<br>(0.006) | 3.4E-07 | 5.5E-01 | 23,645 | 0.028<br>(0.004) | 1.3E-11 | 3.3E-01 | 46,617 |
| FG                    | <i>GCKR</i>                              | rs1260326   | 2  | 27,730,940  | C/T | 0.64 | 0.032<br>(0.007) | 1.9E-06 | 1.3E-01 | 17,704 | 0.037<br>(0.006) | 1.6E-09 | 1.2E-01 | 23,617 | 0.033<br>(0.004) | 2.2E-15 | 5.8E-01 | 46,583 |
| FG                    | <i>G6PC2</i>                             | rs560887    | 2  | 169,763,148 | C/T | 0.69 | 0.084<br>(0.008) | 1.1E-27 | 2.8E-06 | 15,363 | 0.097<br>(0.007) | 3.4E-39 | 4.9E-05 | 19,466 | 0.087<br>(0.005) | 1.5E-72 | 2.3E-01 | 40,091 |
| FG                    | <i>SLC2A2</i>                            | rs7356034   | 3  | 170,732,599 | G/A | 0.73 | 0.031<br>(0.007) | 2.4E-05 | 2.7E-01 | 17,725 | 0.025<br>(0.007) | 1.3E-04 | 4.8E-01 | 23,674 | 0.025<br>(0.004) | 1.5E-08 | 5.7E-01 | 46,661 |
| FG                    | <i>PCSK1</i>                             | rs144489757 | 5  | 95,694,609  | C/G | 0.70 | 0.024<br>(0.007) | 7.7E-04 | 5.6E-01 | 17,716 | 0.031<br>(0.006) | 1.1E-06 | 7.2E-01 | 23,616 | 0.025<br>(0.004) | 7.3E-09 | 4.3E-01 | 46,594 |
| FG                    | <i>CDKAL1</i>                            | rs7747724   | 6  | 20,751,315  | T/C | 0.58 | 0.018<br>(0.007) | 1.6E-02 | 7.8E-01 | 15,357 | 0.029<br>(0.007) | 2.8E-05 | 1.9E-01 | 19,449 | 0.027<br>(0.005) | 3.5E-09 | 2.4E-01 | 40,068 |
| FG                    | <i>DGKB-<br/>TMEM195</i>                 | rs13220985  | 7  | 15,062,694  | A/G | 0.51 | 0.042<br>(0.007) | 8.1E-11 | 4.5E-01 | 17,696 | 0.029<br>(0.006) | 1.0E-06 | 8.2E-01 | 23,628 | 0.033<br>(0.004) | 1.4E-16 | 1.2E-01 | 46,586 |
| FG                    | <i>GCK</i>                               | rs878521    | 7  | 44,255,643  | A/G | 0.23 | 0.059<br>(0.008) | 7.3E-14 | 9.9E-01 | 17,726 | 0.070<br>(0.007) | 1.4E-22 | 2.0E-02 | 23,662 | 0.062<br>(0.005) | 1.0E-36 | 2.9E-01 | 46,650 |
| FG                    | <i>SLC30A8</i>                           | rs11558471  | 8  | 118,185,733 | A/G | 0.65 | 0.023<br>(0.008) | 2.4E-03 | 3.4E-02 | 15,348 | 0.038<br>(0.007) | 1.0E-07 | 5.5E-01 | 19,494 | 0.029<br>(0.005) | 3.2E-10 | 1.5E-01 | 40,104 |
| FG                    | <i>ADRA2A</i>                            | rs35964103  | 10 | 113,002,526 | C/T | 0.91 | 0.045<br>(0.012) | 1.1E-04 | 4.8E-01 | 17,712 | 0.043<br>(0.010) | 2.9E-05 | 1.2E-01 | 23,636 | 0.041<br>(0.007) | 8.5E-09 | 9.0E-01 | 46,610 |
| FG                    | <i>TCF7L2</i>                            | rs34872471  | 10 | 114,754,071 | C/T | 0.26 | 0.027<br>(0.008) | 5.4E-04 | 8.5E-01 | 17,720 | 0.026<br>(0.007) | 2.3E-04 | 5.0E-02 | 23,641 | 0.027<br>(0.005) | 2.1E-08 | 9.2E-01 | 46,623 |
| FG                    | <i>MTNR1B</i>                            | rs10830963  | 11 | 92,708,710  | G/C | 0.27 | 0.092<br>(0.008) | 5.9E-29 | 1.3E-04 | 15,355 | 0.082<br>(0.008) | 5.7E-25 | 1.0E-03 | 19,461 | 0.084<br>(0.005) | 1.0E-61 | 4.0E-01 | 40,077 |
| FG                    | <i>VPS13C-<br/>C2CD4A/B-<br/>FAM148B</i> | rs1881415   | 15 | 62,388,530  | T/C | 0.52 | 0.025<br>(0.007) | 1.5E-04 | 4.7E-01 | 17,705 | 0.019<br>(0.006) | 1.4E-03 | 5.3E-01 | 23,623 | 0.023<br>(0.004) | 1.7E-08 | 5.0E-01 | 46,590 |
| FI <sub>adjBMI</sub>  | <i>GCKR</i>                              | rs1260326   | 2  | 27,730,940  | C/T | 0.64 | 0.026<br>(0.007) | 7.4E-05 | 3.0E-01 | 11,164 | 0.034<br>(0.006) | 6.4E-08 | 2.8E-03 | 13,075 | 0.030<br>(0.005) | 5.8E-11 | 4.0E-01 | 24,239 |
