# Supplementary material for: Discovery and Fine-Mapping of Glycaemic and Obesity-Related Trait Loci Using High-Density Imputation
Source: PubMed Central journal article supplement (PMC4488845; doi:10.1371/journal.pgen.1005230), 2015-07-01
Supplement: pgen.1005230.s017.pdf [file pgen.1005230.s017.pdf]

**S7 Table. Summary of lead SNPs achieving genome-wide significance in established loci for BMI, WHR<sub>adjBMI</sub>, FG and FI<sub>adjBMI</sub>.**

| Locus                  | Chr | Position (b37) | Index SNP   | Trait                 | Alleles (Effect/Other) | Effect allele freq. | Meta-analysis |         |        | New lead SNP? | Present in HapMap? | Rationale for inclusion in this table                                    | r <sup>2</sup> with previously reported lead SNP | New lead SNP p-value conditional on previous lead SNP |
|------------------------|-----|----------------|-------------|-----------------------|------------------------|---------------------|---------------|---------|--------|---------------|--------------------|--------------------------------------------------------------------------|--------------------------------------------------|-------------------------------------------------------|
|                        |     |                |             |                       |                        |                     | Effect (SE)   | p-value | N      |               |                    |                                                                          |                                                  |                                                       |
| NEGR1                  | 1   | 72,750,500     | rs11209943  | BMI                   | G/A                    | 0.59                | 0.029 (0.005) | 2.2E-08 | 86,996 | Y             | N                  | Top SNP from global meta-analysis                                        | 1                                                | NA                                                    |
|                        | 1   | 72,812,440     | rs2815752   | BMI                   | A/G                    | 0.60                | 0.028 (0.005) | 5.8E-08 | 87,002 |               |                    | Previously reported lead SNP from Speliotes et al (Nature Genetics 2010) | -                                                |                                                       |
| SEC16B                 | 1   | 177,889,025    | rs539515    | BMI                   | C/A                    | 0.20                | 0.042 (0.006) | 7.0E-11 | 86,962 | Y             | N                  | Top SNP from global meta-analysis                                        | 1                                                | NA                                                    |
|                        | 1   | 177,889,480    | rs543874    | BMI                   | G/A                    | 0.20                | 0.041 (0.006) | 1.1E-10 | 86,964 |               |                    | Previously reported lead SNP from Speliotes et al (Nature Genetics 2010) | -                                                |                                                       |
| TMEM18                 | 2   | 630,902        | rs66553418  | BMI                   | T/A                    | 0.82                | 0.062 (0.007) | 6.0E-20 | 86,380 | Y             | N                  | Top SNP from global meta-analysis                                        | 0.94                                             | 0.91                                                  |
|                        | 2   | 622,827        | rs2867125   | BMI                   | C/T                    | 0.83                | 0.060 (0.007) | 2.2E-17 | 79,216 |               |                    | Previously reported lead SNP from Speliotes et al (Nature Genetics 2010) | -                                                |                                                       |
| RBJ-ADCY3-POMC         | 2   | 25,150,011     | rs6749422   | BMI                   | G/C                    | 0.45                | 0.030 (0.005) | 4.0E-09 | 86,845 | Y             | N                  | Top SNP from global meta-analysis                                        | 0.96                                             | 0.079                                                 |
|                        | 2   | 25,158,008     | rs713586    | BMI                   | C/T                    | 0.46                | 0.029 (0.005) | 1.7E-08 | 86,856 |               |                    | Previously reported lead SNP from Speliotes et al (Nature Genetics 2010) | -                                                |                                                       |
| ETV5                   | 3   | 185,834,499    | rs9816226   | BMI                   | A/T                    | 0.81                | 0.040 (0.007) | 1.1E-09 | 86,863 | N             | Y                  | Top SNP from global meta-analysis                                        | 1                                                | NA                                                    |
| GNPDA2                 | 4   | 45,181,334     | rs12507026  | BMI                   | T/A                    | 0.42                | 0.041 (0.005) | 6.2E-14 | 81,630 | Y             | N                  | Top SNP from global meta-analysis                                        | 1                                                | NA                                                    |
|                        | 4   | 45,182,527     | rs10938397  | BMI                   | G/A                    | 0.42                | 0.041 (0.005) | 6.8E-14 | 81,537 |               |                    | Previously reported lead SNP from Speliotes et al (Nature Genetics 2010) | -                                                |                                                       |
| GALNT10                | 5   | 153,546,602    | rs11958496  | BMI                   | G/A                    | 0.42                | 0.034 (0.005) | 3.9E-10 | 79,787 | Y             | N                  | Top SNP from global meta-analysis                                        | 0.75                                             | 0.045                                                 |
|                        | 5   | 153,543,466    | rs7708584   | BMI                   | A/G                    | 0.41                | 0.032 (0.005) | 2.9E-09 | 79,791 |               |                    | Previously reported lead SNP from Monda et al (Nature Genetics 2013)     | -                                                |                                                       |
| TFAP2B                 | 6   | 50,788,778     | rs3798519   | BMI                   | C/A                    | 0.20                | 0.045 (0.006) | 2.0E-12 | 86,950 | Y             | N                  | Top SNP from global meta-analysis                                        | 0.90                                             | 0.022                                                 |
|                        | 6   | 50,803,050     | rs987237    | BMI                   | G/A                    | 0.20                | 0.045 (0.007) | 2.9E-11 | 79,777 |               |                    | Previously reported lead SNP from Speliotes et al (Nature Genetics 2010) | -                                                |                                                       |
| DTX2P1-UPK3BP1-PMS2P11 | 7   | 76,568,075     | rs7804790   | BMI                   | C/T                    | 0.20                | 0.045 (0.008) | 2.8E-08 | 79,335 | Y             | N                  | Top SNP from global meta-analysis                                        | 1                                                | 0.92                                                  |
|                        | 7   | 76,608,143     | rs2245368   | BMI                   | C/T                    | 0.23                | 0.037 (0.008) | 2.1E-06 | 73,564 |               |                    | Previously reported lead SNP from Locke et al (Nature 2014)              | -                                                |                                                       |
| GRID1                  | 10  | 87,355,751     | rs7903554   | BMI                   | G/C                    | 0.07                | 0.059 (0.011) | 1.7E-08 | 86,947 | Y             | N                  | Top SNP from global meta-analysis                                        | 0.86                                             | 0.94                                                  |
|                        | 10  | 87,410,904     | rs7899106   | BMI                   | G/A                    | 0.07                | 0.054 (0.011) | 8.4E-07 | 86,944 |               |                    | Previously reported lead SNP from Locke et al (Nature 2014)              | -                                                |                                                       |
| BDNF                   | 11  | 27,688,286     | rs4517468   | BMI                   | A/T                    | 0.34                | 0.036 (0.005) | 2.2E-11 | 86,922 | Y             | N                  | Top SNP from global meta-analysis                                        | 0.10                                             | 1.9E-06                                               |
|                        | 11  | 27,725,986     | rs10767664  | BMI                   | A/T                    | 0.81                | 0.041 (0.006) | 2.6E-10 | 86,916 |               |                    | Previously reported lead SNP from Speliotes et al (Nature Genetics 2010) | -                                                |                                                       |
| FAIM2                  | 12  | 50,263,148     | rs7132908   | BMI                   | A/G                    | 0.38                | 0.037 (0.005) | 9.6E-13 | 86,905 | Y             | Y                  | Top SNP from global meta-analysis                                        | 0.89                                             | 0.60                                                  |
|                        | 12  | 50,247,468     | rs7138803   | BMI                   | A/G                    | 0.38                | 0.034 (0.005) | 3.6E-10 | 86,923 |               |                    | Previously reported lead SNP from Speliotes et al (Nature Genetics 2010) | -                                                |                                                       |
| NRXN3                  | 14  | 79,899,454     | rs7141420   | BMI                   | T/C                    | 0.52                | 0.035 (0.005) | 8.3E-12 | 86,945 | Y             | Y                  | Top SNP from global meta-analysis                                        | 0.29                                             | 2.2E-05                                               |
|                        | 14  | 79,936,964     | rs10150332  | BMI                   | C/T                    | 0.22                | 0.039 (0.006) | 2.6E-10 | 86,941 |               |                    | Previously reported lead SNP from Speliotes et al (Nature Genetics 2010) | -                                                |                                                       |
| MAP2K5                 | 15  | 68,083,436     | rs4776972   | BMI                   | A/C                    | 0.81                | 0.044 (0.007) | 4.6E-11 | 86,819 | Y             | N                  | Top SNP from global meta-analysis                                        | 0.84                                             | 0.035                                                 |
|                        | 15  | 68,086,838     | rs2241423   | BMI                   | G/A                    | 0.79                | 0.042 (0.007) | 2.9E-10 | 79,649 |               |                    | Previously reported lead SNP from Speliotes et al (Nature Genetics 2010) | -                                                |                                                       |
| GPRC5B                 | 16  | 19,928,662     | rs7190603   | BMI                   | T/C                    | 0.87                | 0.055 (0.008) | 4.7E-13 | 86,661 | Y             | N                  | Top SNP from global meta-analysis                                        | 1                                                | NA                                                    |
|                        | 16  | 19,933,600     | rs12444979  | BMI                   | C/T                    | 0.87                | 0.055 (0.008) | 7.5E-13 | 86,659 |               |                    | Previously reported lead SNP from Speliotes et al (Nature Genetics 2010) | -                                                |                                                       |
| SH2B1                  | 16  | 28,825,605     | rs2008514   | BMI                   | A/G                    | 0.43                | 0.036 (0.005) | 1.4E-11 | 81,542 | Y             | Y                  | Top SNP from global meta-analysis                                        | 0.97                                             | 0.038                                                 |
|                        | 16  | 28,885,659     | rs7359397   | BMI                   | T/C                    | 0.42                | 0.036 (0.006) | 1.2E-10 | 74,356 |               |                    | Previously reported lead SNP from Speliotes et al (Nature Genetics 2010) | -                                                |                                                       |
| FTO                    | 16  | 53,809,123     | rs55872725  | BMI                   | T/C                    | 0.42                | 0.079 (0.005) | 1.0E-50 | 81,551 | Y             | N                  | Top SNP from global meta-analysis                                        | 1                                                | NA                                                    |
|                        | 16  | 53,803,574     | rs1558902   | BMI                   | A/T                    | 0.42                | 0.079 (0.005) | 1.3E-50 | 81,550 |               |                    | Previously reported lead SNP from Speliotes et al (Nature Genetics 2010) | -                                                |                                                       |
| MC4R                   | 18  | 57,838,401     | rs663129    | BMI                   | A/G                    | 0.24                | 0.057 (0.006) | 3.2E-21 | 86,890 | Y             | Y                  | Top SNP from global meta-analysis                                        | 1                                                | NA                                                    |
|                        | 18  | 57,839,769     | rs571312    | BMI                   | A/C                    | 0.24                | 0.054 (0.006) | 6.3E-18 | 79,714 |               |                    | Previously reported lead SNP from Speliotes et al (Nature Genetics 2010) | -                                                |                                                       |
| LY86                   | 6   | 6,749,789      | rs1294437   | WHR <sub>adjBMI</sub> | C/T                    | 0.66                | 0.036 (0.007) | 3.0E-08 | 54,513 | Y             | N                  | Top SNP from global meta-analysis                                        | 0.75                                             | 0.095                                                 |
|                        | 6   | 6,743,149      | rs1294421   | WHR <sub>adjBMI</sub> | G/T                    | 0.62                | 0.034 (0.006) | 9.4E-08 | 54,524 |               |                    | Previously reported lead SNP from Heid et al (Nature Genetics 2010)      | -                                                |                                                       |
| VEGFA                  | 6   | 43,758,873     | rs6905288   | WHR <sub>adjBMI</sub> | A/G                    | 0.56                | 0.043 (0.007) | 4.9E-11 | 54,539 | N             | Y                  | Top SNP from global meta-analysis                                        | 1                                                | NA                                                    |
|                        | 6   | 127,454,893    | rs72959041  | WHR <sub>adjBMI</sub> | A/G                    | 0.08                | 0.108 (0.015) | 1.7E-13 | 47,373 | Y             | N                  | Top SNP from global meta-analysis                                        | 0.04                                             | 8.4E-11                                               |
| RSPO3                  | 6   | 127,452,639    | rs9491696   | WHR <sub>adjBMI</sub> | G/C                    | 0.49                | 0.041 (0.006) | 2.1E-11 | 54,555 |               |                    | Previously reported lead SNP from Heid et al (Nature Genetics 2010)      | -                                                |                                                       |
|                        | 1   | 214,158,132    | rs340876    | FG                    | T/C                    | 0.55                | 0.028 (0.004) | 1.3E-11 | 46,617 | Y             | N                  | Top SNP from global meta-analysis                                        | 0.82                                             | 0.020                                                 |
| PROX1                  | 1   | 214,159,256    | rs340874    | FG                    | C/T                    | 0.53                | 0.029 (0.004) | 8.8E-11 | 40,091 |               |                    | Previously reported lead SNP from Dupuis et al. (Nature Genetics, 2010)  | -                                                |                                                       |
|                        | 2   | 27,730,940     | rs1260326   | FG                    | C/T                    | 0.64                | 0.033 (0.004) | 2.2E-15 | 46,583 | Y             | Y                  | Top SNP from global meta-analysis                                        | 0.93                                             | 0.0068                                                |
| GCKR                   | 2   | 27,741,237     | rs780094    | FG                    | C/T                    | 0.65                | 0.031 (0.004) | 8.5E-14 | 46,588 |               |                    | Previously reported lead SNP from Dupuis et al. (Nature Genetics, 2010)  | -                                                |                                                       |
| G6PC2                  | 2   | 169,763,148    | rs560887    | FG                    | C/T                    | 0.69                | 0.087 (0.005) | 1.5E-72 | 40,091 | N             | Y                  | Top SNP from global meta-analysis                                        | 1                                                | NA                                                    |
|                        | 3   | 170,732,599    | rs7356034   | FG                    | G/A                    | 0.73                | 0.025 (0.004) | 1.5E-08 | 46,661 | Y             | N                  | Top SNP from global meta-analysis                                        | 0.42                                             | 8.6E-05                                               |
| SLC2A2                 | 3   | 170,717,521    | rs11920090  | FG                    | T/A                    | 0.88                | 0.028 (0.007) | 1.8E-05 | 40,119 |               |                    | Previously reported lead SNP from Dupuis et al. (Nature Genetics, 2010)  | -                                                |                                                       |
|                        | 5   | 95,694,609     | rs144489757 | FG                    | C/G                    | 0.70                | 0.025 (0.004) | 7.3E-09 | 46,594 | Y             | N                  | Top SNP from global meta-analysis                                        | 0.62                                             | 6.9E-04                                               |
| PCSK1                  | 5   | 95,539,448     | rs4869272   | FG                    | T/C                    | 0.68                | 0.022 (0.005) | 2.6E-06 | 40,106 |               |                    | Previously reported lead SNP from Scott et al. (Nat Gen 2012)            | -                                                |                                                       |
|                        | 6   | 20,751,315     | rs7747724   | FG                    | T/C                    | 0.58                | 0.027 (0.005) | 3.5E-09 | 40,068 | Y             | Y                  | Top SNP from global meta-analysis                                        | 0.21                                             | 1.7E-06                                               |
| CDKAL1                 | 6   | 20,686,996     | rs9368222   | FG                    | A/C                    | 0.27                | 0.017 (0.005) | 3.8E-04 | 40,058 |               |                    | Previously reported lead SNP from Scott et al. (Nat Gen 2012)            | -                                                |                                                       |
|                        | 7   | 15,062,694     | rs13220985  | FG                    | A/G                    | 0.51                | 0.033 (0.004) | 1.4E-16 | 46,586 | Y             | N                  | Top SNP from global meta-analysis                                        | 1                                                | NA                                                    |
| DGKB-TMEM195           | 7   | 15,064,309     | rs2191349   | FG                    | T/G                    | 0.50                | 0.034 (0.004) | 7.9E-15 | 40,053 |               |                    | Previously reported lead SNP from Dupuis et al. (Nature Genetics, 2010)  | -                                                |                                                       |
|                        | 7   | 44,255,643     | rs878521    | FG                    | A/G                    | 0.23                | 0.062 (0.005) | 1.0E-36 | 46,650 | Y             | N                  | Top SNP from global meta-analysis                                        | 0.55                                             | 4.7E-14                                               |
| GCK                    | 7   | 44,235,668     | rs4607517   | FG                    | A/G                    | 0.13                | 0.068 (0.007) | 3.9E-25 | 40,112 |               |                    | Previously reported lead SNP from Dupuis et al. (Nature Genetics, 2010)  | -                                                |                                                       |

|                               |    |             |            |    |                   |      |               |               |         |        |   |                                                                         |                                                                         |         |        |
|-------------------------------|----|-------------|------------|----|-------------------|------|---------------|---------------|---------|--------|---|-------------------------------------------------------------------------|-------------------------------------------------------------------------|---------|--------|
| <i>SLC30A8</i>                | 8  | 118,185,733 | rs11558471 | FG | A/G               | 0.65 | 0.029 (0.005) | 3.2E-10       | 40,104  | N      | Y | Top SNP from global meta-analysis                                       | 1                                                                       | NA      |        |
|                               | 10 | 113,002,526 | rs35964103 | FG | C/T               | 0.91 | 0.041 (0.007) | 8.5E-09       | 46,610  | Y      | N | Top SNP from global meta-analysis                                       | 0.50                                                                    | 0.0013  |        |
| <i>ADRA2A</i>                 | 10 | 113,042,093 | rs10885122 | FG | G/T               | 0.88 | 0.032 (0.007) | 1.3E-06       | 40,082  |        |   | Previously reported lead SNP from Dupuis et al. (Nature Genetics, 2010) | -                                                                       |         |        |
|                               | 10 | 114,754,071 | rs34872471 | FG | C/T               | 0.26 | 0.027 (0.005) | 2.1E-08       | 46,623  | Y      | N | Top SNP from global meta-analysis                                       | 0.89                                                                    | 0.015   |        |
| <i>TCF7L2</i>                 | 10 | 114,756,041 | rs4506565  | FG | T/A               | 0.27 | 0.026 (0.005) | 4.1E-07       | 40,098  |        |   | Previously reported lead SNP from Dupuis et al. (Nature Genetics, 2010) | -                                                                       |         |        |
| <i>MTNR1B</i>                 | 11 | 92,708,710  | rs10830963 | FG | G/C               | 0.27 | 0.084 (0.005) | 1.0E-61       | 40,077  | N      | Y | Top SNP from global meta-analysis                                       | 1                                                                       | NA      |        |
| <i>VPS13C-C2CD4AB-FAM148B</i> | 15 | 62,388,530  | rs1881415  | FG | T/C               | 0.52 | 0.023 (0.004) | 1.7E-08       | 46,590  | Y      | N | Top SNP from global meta-analysis                                       | 0.20                                                                    | 1.8E-08 |        |
|                               | 15 | 62,433,962  | rs11071657 | FG | A/G               | 0.62 | 0.006 (0.005) | 1.9E-01       | 40,060  |        |   | Previously reported lead SNP from Dupuis et al. (Nature Genetics, 2010) | -                                                                       |         |        |
|                               | 2  | 27,730,940  | rs1260326  |    | $F_{13d}^{dIBMI}$ | C/T  | 0.64          | 0.030 (0.005) | 5.8E-11 | 24,239 | Y | Y                                                                       | Top SNP from global meta-analysis                                       | 0.93    | 0.0068 |
| <i>GCKR</i>                   | 2  | 27,741,237  | rs780094   |    | $F_{13d}^{dIBMI}$ | C/T  | 0.64          | 0.027 (0.005) | 3.2E-09 | 24,241 |   |                                                                         | Previously reported lead SNP from Dupuis et al. (Nature Genetics, 2010) | -       |        |
