# Supplementary material for: Discovery and Fine-Mapping of Glycaemic and Obesity-Related Trait Loci Using High-Density Imputation
Source: PubMed Central journal article supplement (PMC4488845; doi:10.1371/journal.pgen.1005230), 2015-07-01
Supplement: pgen.1005230.s018.pdf [file pgen.1005230.s018.pdf]

**S8 Table. Approximate conditional analysis results for BMI, WHR<sub>adjBMI</sub>, FG and FI<sub>adjBMI</sub>.**

**a. BMI**

| Index SNP  | Chr | Position    | Locus                  | Effect allele | Meta-analysis |                |         | Joint analysis with LD estimated from 58BC-WTCCC |         | Joint analysis with LD estimated from NFBC1966 |         |
|------------|-----|-------------|------------------------|---------------|---------------|----------------|---------|--------------------------------------------------|---------|------------------------------------------------|---------|
|            |     |             |                        |               | EAF           | $\beta$ (SE)   | P       | B (SE)                                           | P       | B (SE)                                         | P       |
| rs11209943 | 1   | 72,750,500  | NEGR1                  | A             | 0.41          | -0.029 (0.005) | 2.2E-08 | -0.029 (0.005)                                   | 2.1E-08 | -0.029 (0.005)                                 | 2.1E-08 |
| rs539515   | 1   | 177,889,025 | SEC16B                 | A             | 0.80          | -0.042 (0.006) | 7.0E-11 | -0.042 (0.006)                                   | 6.9E-11 | -0.042 (0.006)                                 | 6.9E-11 |
| rs5017305  | 2   | 630,902     | TMEM18                 | A             | 0.18          | -0.062 (0.007) | 6.0E-20 | -0.062 (0.007)                                   | 5.9E-20 | -0.062 (0.007)                                 | 5.9E-20 |
| rs6749422  | 2   | 25,150,011  | RBJ-ADCY3-POMC         | C             | 0.55          | -0.030 (0.005) | 4.0E-09 | -0.030 (0.005)                                   | 3.9E-09 | -0.030 (0.005)                                 | 3.9E-09 |
| rs9816226  | 3   | 185,834,499 | ETV5                   | A             | 0.19          | -0.040 (0.007) | 1.1E-09 | -0.040 (0.007)                                   | 1.1E-09 | -0.040 (0.007)                                 | 1.1E-09 |
| rs12507026 | 4   | 45,181,334  | GNPDA2                 | A             | 0.58          | -0.041 (0.005) | 6.2E-14 | -0.041 (0.005)                                   | 6.0E-14 | -0.041 (0.005)                                 | 6.0E-14 |
| rs11958496 | 5   | 153,546,602 | GALNT10                | G             | 0.42          | 0.034 (0.005)  | 3.9E-10 | 0.034 (0.005)                                    | 3.8E-10 | 0.034 (0.005)                                  | 3.8E-10 |
| rs3798519  | 6   | 50,788,778  | TFAP2B                 | A             | 0.80          | -0.045 (0.006) | 2.0E-12 | -0.045 (0.006)                                   | 1.9E-12 | -0.045 (0.006)                                 | 1.9E-12 |
| rs7804790  | 7   | 76,568,075  | DTX2P1-UPK3BP1-PMS2P11 | C             | 0.20          | 0.045 (0.008)  | 2.8E-08 | 0.045 (0.008)                                    | 2.7E-08 | 0.045 (0.008)                                  | 2.7E-08 |
| rs7903554  | 10  | 87,355,751  | GRID1                  | C             | 0.93          | -0.059 (0.011) | 1.7E-08 | -0.059 (0.011)                                   | 1.6E-08 | -0.059 (0.011)                                 | 1.6E-08 |
| rs4517468  | 11  | 27,688,286  | BDNF                   | A             | 0.34          | 0.036 (0.005)  | 2.2E-11 | 0.036 (0.005)                                    | 2.1E-11 | 0.036 (0.005)                                  | 2.1E-11 |
| rs7132908  | 12  | 50,263,148  | FAIM2                  | G             | 0.62          | -0.037 (0.005) | 9.6E-13 | -0.037 (0.005)                                   | 9.4E-13 | -0.037 (0.005)                                 | 9.4E-13 |
| rs1966714  | 12  | 90,671,038  | EPYC                   | A             | 0.46          | 0.036 (0.006)  | 1.9E-08 | 0.036 (0.006)                                    | 1.9E-08 | 0.036 (0.007)                                  | 1.9E-08 |
| rs12885467 | 14  | 33,303,788  | AKAP6                  | T             | 0.51          | -0.029 (0.005) | 4.5E-08 | -0.029 (0.005)                                   | 4.4E-08 | -0.030 (0.005)                                 | 1.7E-08 |
| rs7141420  | 14  | 79,899,454  | NRXN3                  | C             | 0.48          | -0.035 (0.005) | 8.3E-12 | -0.035 (0.005)                                   | 8.1E-12 | -0.035 (0.005)                                 | 8.1E-12 |
| rs4776972  | 15  | 68,083,436  | MAP2K5                 | A             | 0.81          | 0.044 (0.007)  | 4.6E-11 | 0.044 (0.007)                                    | 4.4E-11 | 0.044 (0.007)                                  | 4.4E-11 |
| rs7204864  | 16  | 19,942,927  | GPRC5B                 | C             | 0.87          | 0.055 (0.008)  | 4.7E-13 | 0.056 (0.008)                                    | 1.5E-13 | 0.056 (0.008)                                  | 2.8E-13 |
| rs2008514  | 16  | 28,825,605  | SH2B1                  | G             | 0.57          | -0.036 (0.005) | 1.4E-11 | -0.037 (0.005)                                   | 4.4E-12 | -0.037 (0.005)                                 | 8.1E-12 |
| rs55872725 | 16  | 53,809,123  | FTO                    | C             | 0.58          | -0.079 (0.005) | 1.0E-50 | -0.079 (0.005)                                   | 1.2E-50 | -0.079 (0.005)                                 | 1.2E-50 |
| rs663129   | 18  | 57,838,401  | MC4R                   | G             | 0.76          | -0.057 (0.006) | 3.2E-21 | -0.057 (0.006)                                   | 3.1E-21 | -0.057 (0.006)                                 | 3.1E-21 |

**b. WHR<sub>adjBMI</sub>**

| Index SNP  | Chr | Position    | Locus | Effect allele | Meta-analysis |                |         | Joint analysis with LD estimated from 58BC-WTCCC |         | Joint analysis with LD estimated from NFBC1966 |         |
|------------|-----|-------------|-------|---------------|---------------|----------------|---------|--------------------------------------------------|---------|------------------------------------------------|---------|
|            |     |             |       |               | EAF           | $\beta$ (SE)   | P       | B (SE)                                           | P       | B (SE)                                         | P       |
| rs1294437  | 6   | 6,749,789   | LY86  | C             | 0.66          | 0.036 (0.007)  | 3.0E-08 | 0.036 (0.007)                                    | 3.0E-08 | 0.036 (0.007)                                  | 3.0E-08 |
| rs6905288  | 6   | 43,758,873  | VEGFA | G             | 0.44          | -0.043 (0.007) | 4.9E-11 | -0.043 (0.007)                                   | 4.8E-11 | -0.043 (0.007)                                 | 4.8E-11 |
| rs72959041 | 6   | 127,454,893 | RSPO3 | G             | 0.92          | -0.110 (0.015) | 1.7E-13 | -0.096 (0.015)                                   | 9.8E-11 | -0.092 (0.015)                                 | 6.6E-10 |
| rs4509142  | 6   | 127,489,001 | RSPO3 | C             | 0.49          | -0.043 (0.006) | 2.9E-12 | -0.038 (0.006)                                   | 1.7E-09 | -0.036 (0.006)                                 | 1.2E-08 |

**c. FG**

| Index SNP   | Chr | Position    | Locus                         | Effect allele | Meta-analysis |                |         | Joint analysis with LD estimated from 58BC-WTCCC |         | Joint analysis with LD estimated from NFBC1966 |         |
|-------------|-----|-------------|-------------------------------|---------------|---------------|----------------|---------|--------------------------------------------------|---------|------------------------------------------------|---------|
|             |     |             |                               |               | EAf           | $\beta$ (SE)   | P       | B (SE)                                           | P       | B (SE)                                         | P       |
| rs340876    | 1   | 214,158,132 | <i>PROX1</i>                  | C             | 0.45          | -0.028 (0.004) | 1.3E-11 | -0.028 (0.004)                                   | 1.3E-11 | -0.028 (0.004)                                 | 1.3E-11 |
| rs1260326   | 2   | 27,730,940  | <i>GCKR</i>                   | T             | 0.36          | -0.033 (0.004) | 2.2E-15 | -0.033 (0.004)                                   | 2.2E-15 | -0.033 (0.004)                                 | 2.2E-15 |
| rs150171632 | 2   | 169,748,691 | <i>G6PC2</i>                  | C             | 0.99          | 0.182 (0.020)  | 3.0E-19 | 0.192 (0.020)                                    | 4.1E-21 | 0.259 (0.023)                                  | 2.0E-29 |
| rs11679727  | 2   | 169,754,098 | <i>G6PC2</i>                  | A             | 0.77          | 0.089 (0.006)  | 3.2E-54 | 0.041 (0.007)                                    | 9.1E-09 | 0.051 (0.007)                                  | 6.2E-15 |
| 2-169754143 | 2   | 169,754,143 | <i>G6PC2</i>                  | C             | 0.92          | 0.100 (0.010)  | 5.2E-25 |                                                  |         | 0.067 (0.010)                                  | 8.3E-12 |
| rs34177044  | 2   | 169,754,485 | <i>G6PC2</i>                  | G             | 0.78          | -0.069 (0.005) | 2.4E-43 | -0.042 (0.005)                                   | 1.1E-15 | -0.053 (0.005)                                 | 1.9E-24 |
| rs16856159  | 2   | 169,759,903 | <i>G6PC2</i>                  | G             | 0.91          | -0.020 (0.007) | 5.4E-03 |                                                  |         | -0.072 (0.008)                                 | 5.0E-18 |
| rs560887    | 2   | 169,763,148 | <i>G6PC2</i>                  | T             | 0.31          | -0.087 (0.005) | 1.5E-72 | -0.055 (0.006)                                   | 8.3E-19 |                                                |         |
| rs1101532   | 2   | 169,810,416 | <i>G6PC2</i>                  | T             | 0.46          | -0.060 (0.004) | 4.3E-51 |                                                  |         | -0.034 (0.005)                                 | 2.3E-13 |
| rs7356034   | 3   | 170,732,599 | <i>SLC2A2</i>                 | G             | 0.73          | 0.025 (0.004)  | 1.5E-08 | 0.025 (0.004)                                    | 1.5E-08 | 0.025 (0.005)                                  | 1.5E-08 |
| rs144489757 | 5   | 95,694,609  | <i>PCSK1</i>                  | C             | 0.70          | 0.025 (0.004)  | 7.3E-09 | 0.025 (0.004)                                    | 7.2E-09 | 0.025 (0.004)                                  | 7.2E-09 |
| rs7747724   | 6   | 20,751,315  | <i>CDKAL1</i>                 | T             | 0.58          | 0.027 (0.005)  | 3.5E-09 | 0.027 (0.005)                                    | 3.4E-09 | 0.027 (0.005)                                  | 3.4E-09 |
| rs13220985  | 7   | 15,062,694  | <i>DGKB-TMEM195</i>           | A             | 0.51          | 0.033 (0.004)  | 1.4E-16 | 0.033 (0.004)                                    | 1.3E-16 | 0.033 (0.004)                                  | 1.3E-16 |
| rs2268577   | 7   | 44,189,010  | <i>GCK</i>                    | C             | 0.82          | -0.045 (0.005) | 8.6E-18 |                                                  |         | -0.039 (0.005)                                 | 2.3E-13 |
| rs10259649  | 7   | 44,219,705  | <i>GCK</i>                    | T             | 0.78          | -0.053 (0.005) | 8.6E-29 | -0.038 (0.005)                                   | 2.3E-14 |                                                |         |
| rs878521    | 7   | 44,255,643  | <i>GCK</i>                    | G             | 0.77          | -0.062 (0.005) | 1.0E-36 | -0.050 (0.005)                                   | 2.8E-22 | -0.058 (0.005)                                 | 3.1E-32 |
| rs11558471  | 8   | 118,185,733 | <i>SLC30A8</i>                | A             | 0.65          | 0.029 (0.005)  | 3.2E-10 | 0.029 (0.005)                                    | 3.2E-10 | 0.029 (0.005)                                  | 3.2E-10 |
| rs35964103  | 10  | 113,002,526 | <i>ADRA2A</i>                 | C             | 0.91          | 0.041 (0.007)  | 8.5E-09 | 0.041 (0.007)                                    | 1.3E-08 | 0.046 (0.007)                                  | 2.1E-10 |
| rs17747324  | 10  | 114,752,503 | <i>TCF7L2</i>                 | T             | 0.79          | -0.027 (0.005) | 7.6E-08 |                                                  |         | -0.031 (0.005)                                 | 1.9E-09 |
| rs34872471  | 10  | 114,754,071 | <i>TCF7L2</i>                 | T             | 0.74          | -0.027 (0.005) | 2.1E-08 | -0.026 (0.005)                                   | 3.1E-08 |                                                |         |
| rs7113297   | 11  | 92,671,744  | <i>MTNR1B</i>                 | C             | 0.82          | -0.064 (0.007) | 2.6E-19 | -0.041 (0.007)                                   | 2.1E-08 | -0.041 (0.007)                                 | 2.2E-08 |
| rs11020121  | 11  | 92,683,830  | <i>MTNR1B</i>                 | T             | 0.77          | -0.073 (0.006) | 1.5E-36 |                                                  |         | -0.036 (0.007)                                 | 3.3E-08 |
| rs10830963  | 11  | 92708710    | <i>MTNR1B</i>                 | C             | 0.73          | -0.084 (0.005) | 1.0E-61 | -0.078 (0.005)                                   | 1.3E-50 | -0.063 (0.006)                                 | 1.1E-26 |
| rs17331697  | 12  | 97,868,906  | <i>RMST</i>                   | T             | 0.90          | 0.046 (0.007)  | 1.3E-11 | 0.05 (0.007)                                     | 1.3E-11 | 0.046 (0.007)                                  | 1.3E-11 |
| rs1881415   | 15  | 62,388,530  | <i>VPS13C-C2CD4AB-FAM148B</i> | T             | 0.52          | 0.023 (0.004)  | 1.7E-08 | 0.02 (0.004)                                     | 1.7E-08 | 0.023 (0.004)                                  | 1.7E-08 |

**d.  $F_{adjBMI}$**

| Index SNP | Chr | Position   | Locus       | Effect allele | Meta-analysis |                |         | Joint analysis with LD estimated from 58BC-WTCCC |         | Joint analysis with LD estimated from NFBC1966 |         |
|-----------|-----|------------|-------------|---------------|---------------|----------------|---------|--------------------------------------------------|---------|------------------------------------------------|---------|
|           |     |            |             |               | EAf           | $\beta$ (SE)   | P       | B (SE)                                           | P       | B (SE)                                         | P       |
| rs1260326 | 2   | 27,730,940 | <i>GCKR</i> | T             | 0.36          | -0.030 (0.005) | 5.8E-11 | -0.030 (0.005)                                   | 5.8E-11 | -0.030 (0.005)                                 | 5.8E-11 |

Summary of SNPs achieving  $p < 5 \times 10^{-8}$  in the joint analysis using BC58 and NFB66 cohorts as reference samples, respectively. SNPs on different chromosomes or more than 10Mb distant are assumed to be in linkage equilibrium. Chr, chromosome; Position in NCBI build 37; EAF, effect allele frequency in meta-analysis result;  $\beta$ , marginal effect; B, joint effect.
