# Supplementary material for: Discovery and Fine-Mapping of Glycaemic and Obesity-Related Trait Loci Using High-Density Imputation
Source: PubMed Central journal article supplement (PMC4488845; doi:10.1371/journal.pgen.1005230), 2015-07-01
Supplement: pgen.1005230.s019.pdf [file pgen.1005230.s019.pdf]

**S9 Table. Summary of 99% credible sets at 42 distinct association signals.**

| Trait                 | Locus                         | Index variant | Chr | Number of variants | Distance | Interval start (b37) | Interval stop (b37) | Number (%) of variants not in HapMap | Posterior probability of variants not in HapMap |
|-----------------------|-------------------------------|---------------|-----|--------------------|----------|----------------------|---------------------|--------------------------------------|-------------------------------------------------|
| BMI                   | <i>NEGR1</i>                  | rs11209943    | 1   | 159                | 567,218  | 72,387,666           | 72,954,883          | 87 (55%)                             | 0.61                                            |
| BMI                   | <i>SEC16B</i>                 | rs539515      | 1   | 18                 | 33,235   | 177,861,357          | 177,894,591         | 9 (50%)                              | 0.45                                            |
| BMI                   | <i>TMEM18</i>                 | rs66553418    | 2   | 175                | 39,707   | 614,168              | 653,874             | 100 (57%)                            | 0.52                                            |
| BMI                   | <i>RBJ-ADCY3-POMC</i>         | rs6749422     | 2   | 158                | 216,259  | 25,075,281           | 25,291,539          | 77 (49%)                             | 0.54                                            |
| BMI                   | <i>ETV5</i>                   | rs9816226     | 3   | 27                 | 76,173   | 185,769,425          | 185,845,597         | 24 (89%)                             | 0.83                                            |
| BMI                   | <i>GNPDA2</i>                 | rs12507026    | 4   | 5                  | 10,449   | 45,175,691           | 45,186,139          | 2 (40%)                              | 0.49                                            |
| BMI                   | <i>GALNT10</i>                | rs11958496    | 5   | 43                 | 67,279   | 153,497,400          | 153,564,678         | 12 (28%)                             | 0.49                                            |
| BMI                   | <i>TFAP2B</i>                 | rs3798519     | 6   | 37                 | 132,825  | 50,788,778           | 50,921,602          | 27 (73%)                             | 0.82                                            |
| BMI                   | <i>DTX2P1-UPK3BP1-PMS2P11</i> | rs7804790     | 7   | 122                | 226,786  | 76,500,308           | 76,727,093          | 114 (93%)                            | 0.91                                            |
| BMI                   | <i>GRID1</i>                  | rs7903554     | 10  | 165                | 288,937  | 87,339,257           | 87,628,193          | 52 (32%)                             | 0.92                                            |
| BMI                   | <i>BDNF</i>                   | rs4517468     | 11  | 59                 | 101,835  | 27,634,373           | 27,736,207          | 32 (54%)                             | 0.63                                            |
| BMI                   | <i>FAIM2</i>                  | rs7132908     | 12  | 17                 | 64,526   | 50,215,905           | 50,280,430          | 12 (71%)                             | 0.55                                            |
| BMI                   | <i>ATP2B1</i>                 | rs1966714     | 12  | 79                 | 120,498  | 90,594,389           | 90,714,886          | 32 (41%)                             | 0.45                                            |
| BMI                   | <i>AKAP6</i>                  | rs12885467    | 14  | 38                 | 27,264   | 33,282,232           | 33,309,495          | 19 (50%)                             | 0.43                                            |
| BMI                   | <i>NRXN3</i>                  | rs7141420     | 14  | 17                 | 54,707   | 79,890,456           | 79,945,162          | 5 (29%)                              | 0.13                                            |
| BMI                   | <i>MAP2K5</i>                 | rs4776972     | 15  | 94                 | 319,694  | 67,808,076           | 68,127,769          | 49 (52%)                             | 0.47                                            |
| BMI                   | <i>GPRC5B</i>                 | rs7190603     | 16  | 44                 | 144,936  | 19,832,798           | 19,977,733          | 36 (82%)                             | 0.89                                            |
| BMI                   | <i>SH2B1</i>                  | rs2008514     | 16  | 127                | 511,888  | 28,383,243           | 28,895,130          | 99 (78%)                             | 0.76                                            |
| BMI                   | <i>FTO</i>                    | rs55872725    | 16  | 40                 | 24,030   | 53,798,622           | 53,822,651          | 28 (70%)                             | 0.76                                            |
| BMI                   | <i>MC4R</i>                   | rs663129      | 18  | 21                 | 114,083  | 57,740,612           | 57,854,694          | 12 (57%)                             | 0.44                                            |
| WHR <sub>adjBMI</sub> | <i>LY86</i>                   | rs1294437     | 6   | 24                 | 21,552   | 6,733,540            | 6,755,091           | 13 (54%)                             | 0.82                                            |
| WHR <sub>adjBMI</sub> | <i>VEGFA</i>                  | rs6905288     | 6   | 3                  | 2,432    | 43,757,896           | 43,760,327          | 1 (33%)                              | 0.12                                            |
| WHR <sub>adjBMI</sub> | <i>RSPO3</i>                  | rs72959041    | 6   | 4                  | 140,680  | 127,389,101          | 127,529,780         | 4 (100%)                             | 0.99                                            |
| WHR <sub>adjBMI</sub> | <i>RSPO3</i>                  | rs4509142     | 6   | 403                | 517,946  | 127,014,862          | 127,532,807         | 171 (42%)                            | 0.34                                            |
| FG                    | <i>PROX1</i>                  | rs340876      | 1   | 5                  | 7,162    | 214,156,514          | 214,163,675         | 2 (40%)                              | 0.83                                            |
| FG                    | <i>GCKR</i>                   | rs1260326     | 2   | 3                  | 21,524   | 27,730,940           | 27,752,463          | 1 (33%)                              | 0.03                                            |
| FG                    | <i>G6PC2</i>                  | rs560887      | 2   | 2                  | 9,734    | 169,753,415          | 169,763,148         | 0 (0%)                               | 0                                               |
| FG                    | <i>G6PC2</i>                  | rs138726309   | 2   | 2                  | 14,572   | 169,748,691          | 169,763,262         | 2 (100%)                             | 0.99                                            |
| FG                    | <i>SLC2A2</i>                 | rs7356034     | 3   | 102                | 117,012  | 170,627,909          | 170,744,920         | 67 (66%)                             | 0.53                                            |
| FG                    | <i>PCSK1</i>                  | rs144489757   | 5   | 35                 | 106,333  | 95,630,225           | 95,736,557          | 21 (60%)                             | 0.65                                            |
| FG                    | <i>CDKAL1</i>                 | rs7747724     | 6   | 35                 | 177,554  | 20,721,721           | 20,899,274          | 13 (37%)                             | 0.32                                            |
| FG                    | <i>DGKB-TMEM195</i>           | rs13220985    | 7   | 52                 | 49,936   | 15,016,110           | 15,066,045          | 27 (52%)                             | 0.57                                            |
| FG                    | <i>GCK</i>                    | rs878521      | 7   | 2                  | 23,866   | 44,231,778           | 44,255,643          | 1 (50%)                              | 0.18                                            |
| FG                    | <i>GCK</i>                    | rs10259649    | 7   | 14                 | 70,710   | 44,183,433           | 44,254,142          | 8 (57%)                              | 0.40                                            |
| FG                    | <i>SLC30A8</i>                | rs11558471    | 8   | 7                  | 33,133   | 118,184,783          | 118,217,915         | 4 (57%)                              | 0.42                                            |
| FG                    | <i>ADRA2A</i>                 | rs35964103    | 10  | 66                 | 80,013   | 112,970,951          | 113,050,963         | 45 (68%)                             | 0.73                                            |
| FG                    | <i>TCF7L2</i>                 | rs34872471    | 10  | 27                 | 67,276   | 114,749,734          | 114,817,009         | 22 (82%)                             | 0.79                                            |
| FG                    | <i>MTNR1B</i>                 | rs10830963    | 11  | 1                  | 1        | 92,708,710           | 92,708,710          | 0 (0%)                               | 0                                               |
| FG                    | <i>RMST</i>                   | rs17331697    | 12  | 14                 | 22,286   | 97,846,621           | 97,868,906          | 11 (79%)                             | 0.14                                            |
| FG                    | <i>VPS13C-C2CD4AB-FAM148B</i> | rs1881415     | 15  | 25                 | 189,268  | 62,210,274           | 62,399,541          | 13 (52%)                             | 0.49                                            |
| FG (female)           | <i>EMID2</i>                  | rs6947345     | 7   | 12                 | 97,460   | 100,995,671          | 101,093,130         | 12 (100%)                            | 0.99                                            |
| FI <sub>adjBMI</sub>  | <i>GCKR</i>                   | rs1260326     | 2   | 3                  | 21,524   | 27,730,940           | 27,752,463          | 1 (33%)                              | 0.06                                            |
