# Supplementary material for: Discovery and Fine-Mapping of Glycaemic and Obesity-Related Trait Loci Using High-Density Imputation
Source: PubMed Central journal article supplement (PMC4488845; doi:10.1371/journal.pgen.1005230), 2015-07-01
Supplement: pgen.1005230.s021.pdf [file pgen.1005230.s021.pdf]

**S11 Table. Allele frequency distribution of 99% credible sets with less than 20 variants.**

| <b>Minor allele frequency (MAF)<sup>a</sup></b> | <b>Number (%) of HapMap variants</b> | <b>Number (%) of variants not in HapMap</b> | <b>Number (%) of all 1000G variants</b> |
|-------------------------------------------------|--------------------------------------|---------------------------------------------|-----------------------------------------|
| MAF<0.005                                       | 0                                    | 0                                           | 0                                       |
| 0.005≤MAF<0.01                                  | 0                                    | 0                                           | 0                                       |
| 0.01≤MAF<0.02                                   | 0                                    | 13 (18%)                                    | 13 (10%)                                |
| 0.02≤MAF<0.03                                   | 0                                    | 1 (1.4%)                                    | 1 (0.8%)                                |
| 0.03≤MAF<0.04                                   | 0                                    | 1 (1.4%)                                    | 1 (0.8%)                                |
| 0.04≤MAF<0.05                                   | 0                                    | 0                                           | 0                                       |
| 0.05≤MAF<0.1                                    | 3 (6%)                               | 16 (22%)                                    | 19 (15%)                                |
| 0.1≤MAF<0.2                                     | 12 (23%)                             | 8 (11%)                                     | 20 (16%)                                |
| 0.2≤MAF<0.3                                     | 16 (30%)                             | 13 (18%)                                    | 29 (23%)                                |
| 0.3≤MAF<0.4                                     | 10 (19%)                             | 12 (16%)                                    | 22 (17%)                                |
| 0.4≤MAF<0.5                                     | 12 (23%)                             | 10 (14%)                                    | 22 (17%)                                |
| <b>Total</b>                                    | <b>53</b>                            | <b>74</b>                                   | <b>127</b>                              |

<sup>a</sup>MAF is based on MAF reported in the meta-analysis result.
