# Supplementary material for: Discovery and Fine-Mapping of Glycaemic and Obesity-Related Trait Loci Using High-Density Imputation
Source: PubMed Central journal article supplement (PMC4488845; doi:10.1371/journal.pgen.1005230), 2015-07-01
Supplement: pgen.1005230.s022.pdf [file pgen.1005230.s022.pdf]

**S12 Table. Power to detect association, at genome-wide significance ( $p < 5 \times 10^{-8}$ ), with a variant of MAF 1% in the current study.**

| <b>Trait</b>          | <b>Max <i>N</i></b> | <b>Variant explaining 0.05% of the trait variance</b> | <b>Variant explaining 0.1% of the trait variance</b> | <b>Variant explaining 0.2% of the trait variance</b> |
|-----------------------|---------------------|-------------------------------------------------------|------------------------------------------------------|------------------------------------------------------|
| BMI                   | 87,084              | 0.880                                                 | 0.999                                                | 0.999                                                |
| WHR <sub>adjBMI</sub> | 54,572              | 0.421                                                 | 0.975                                                | 0.999                                                |
| FG                    | 46,694              | 0.277                                                 | 0.921                                                | 0.999                                                |
| FI <sub>adjBMI</sub>  | 24,245              | 0.026                                                 | 0.309                                                | 0.939                                                |
